# Supplementary material for: Immunogenomics reveal molecular circuits of diclofenac induced liver injury in mice
Source: PubMed Central journal article supplement (PMC4924767; doi:10.18632/oncotarget.7698), 2016-02-25
Supplement: oncotarget-07-14983-s001.pdf [file oncotarget-07-14983-s001.pdf]

# Immunogenomics reveal molecular circuits of diclofenac induced liver injury in mice

## Supplementary Materials

### A. Day 1

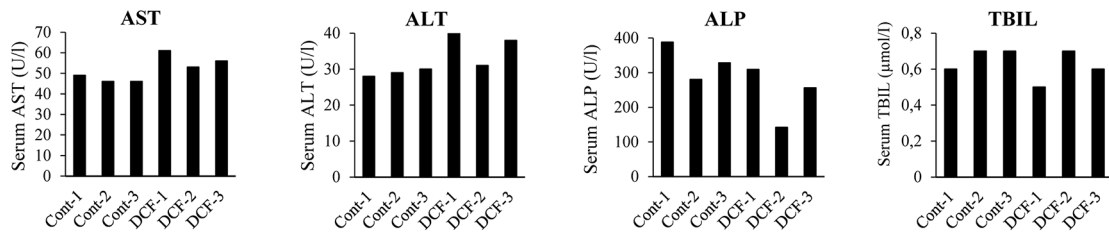

### B. Day 3

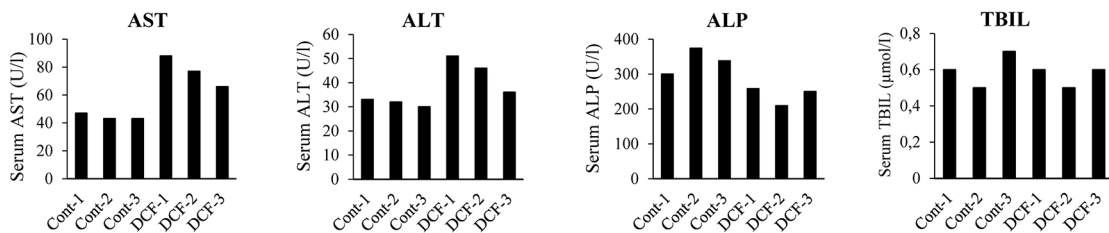

### C. Day 14

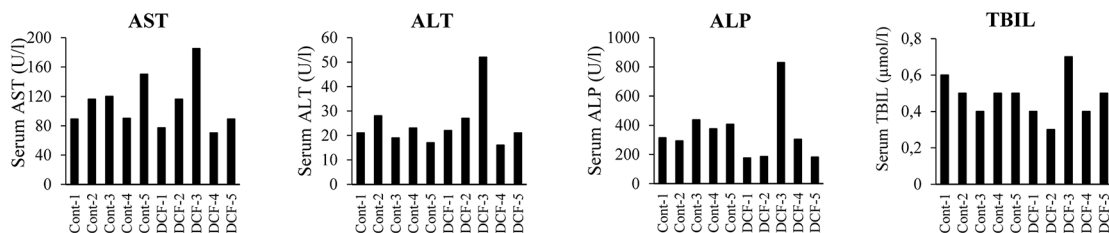

**Supplementary Figure S1: Individual serum AST, ALT, ALP and TBIL values of diclofenac-treated mice. Diclofenac was given to mice for day 1, 3 and 14.**

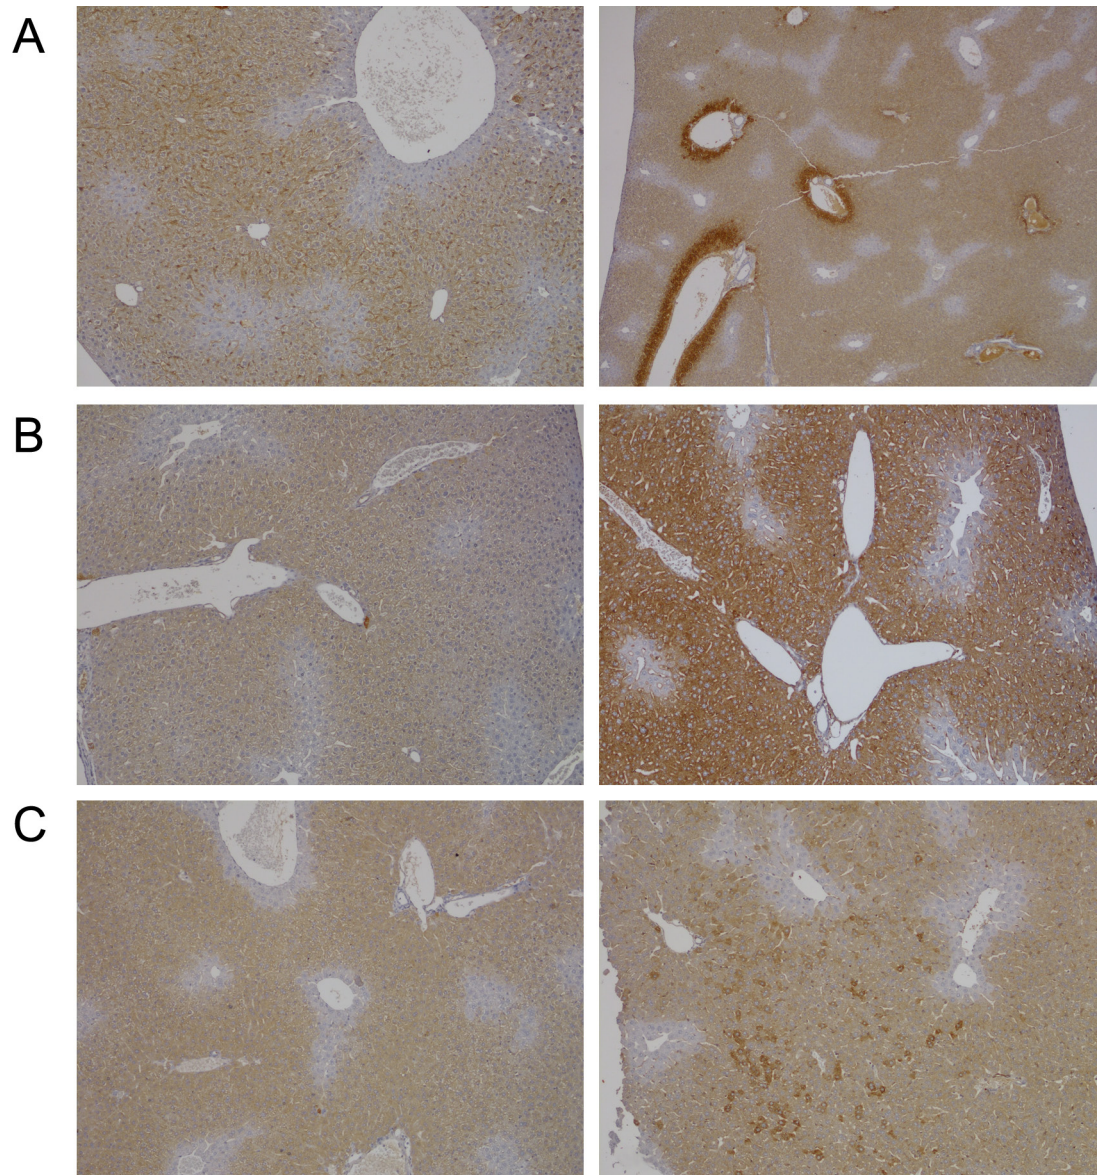

**Supplementary Figure S2: Immunohistochemistry of Hep Par 1 in livers of control and diclofenac treated mice.** (A) from the left to the right: Control and repeated dose 30 mg/kg diclofenac (day 3). (B) from the left to the right: Control and repeated dose 30 mg/kg diclofenac (day 14). (C) from the left to the right: Control and repeated dose 150 mg/kg diclofenac (day 3). Magnifications 70x.

A

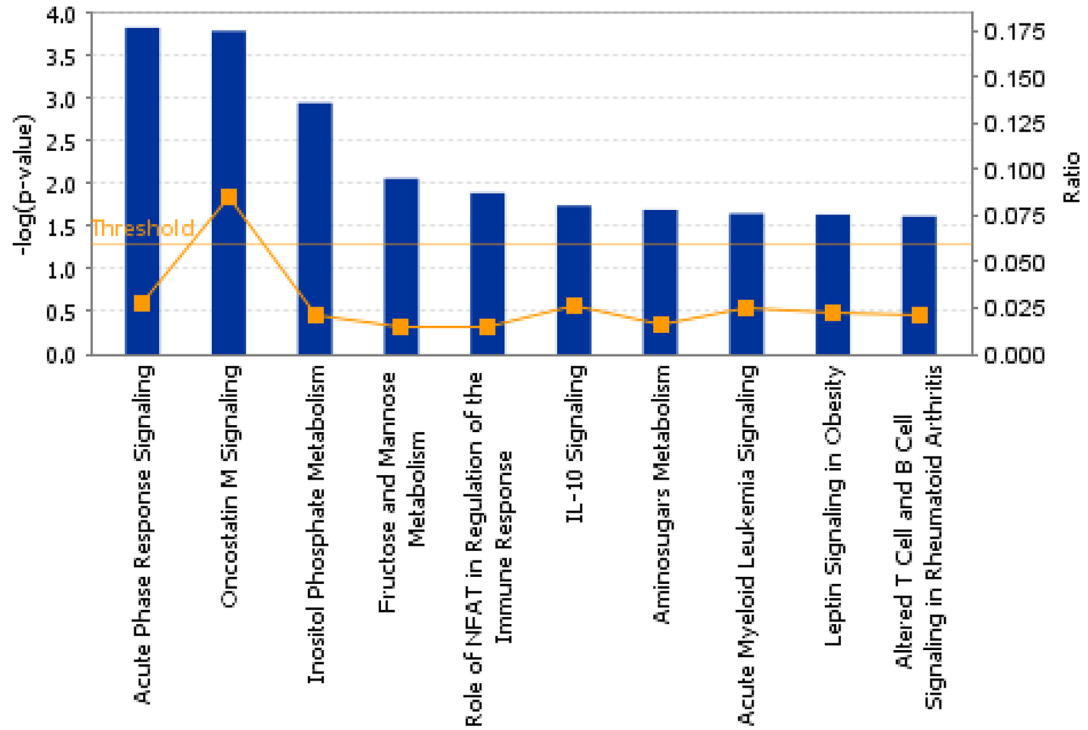

B

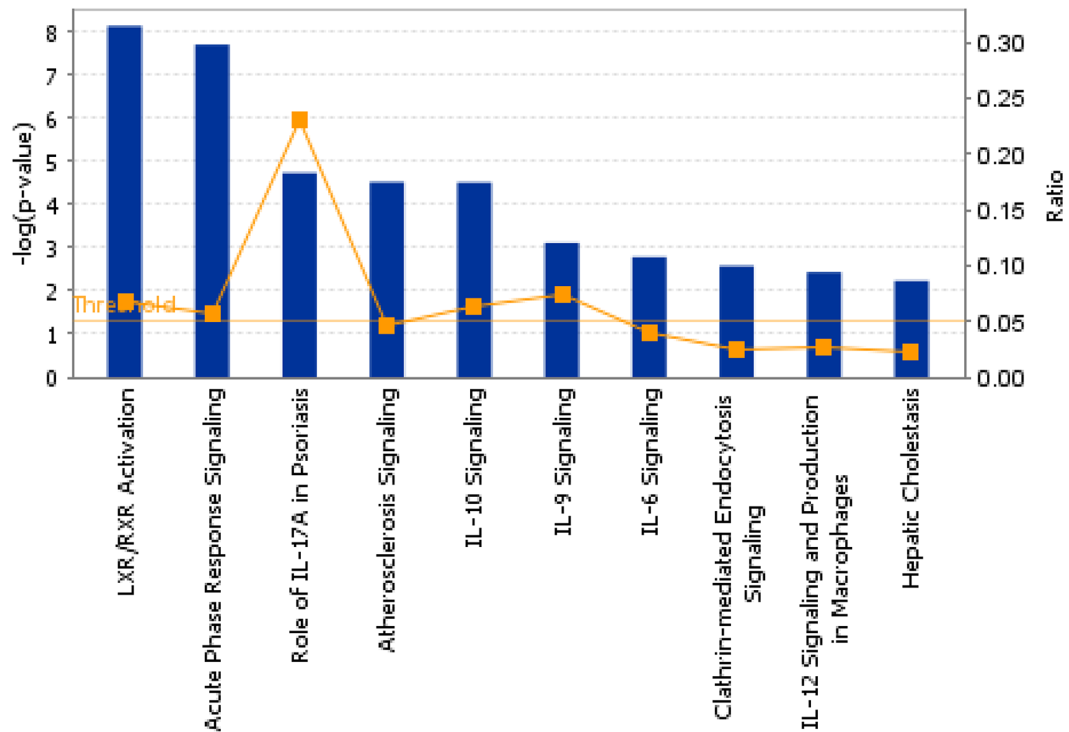

**Supplementary Figure S3: Top 10 canonical pathways after single and repeated diclofenac treatment of mice.** Genes were selected based on a > 1.5 – fold change ( $P < 0.05$ ) cutoff using the GenPlex program. The canonical pathways were analysed using the Ingenuity Pathway Analysis program.

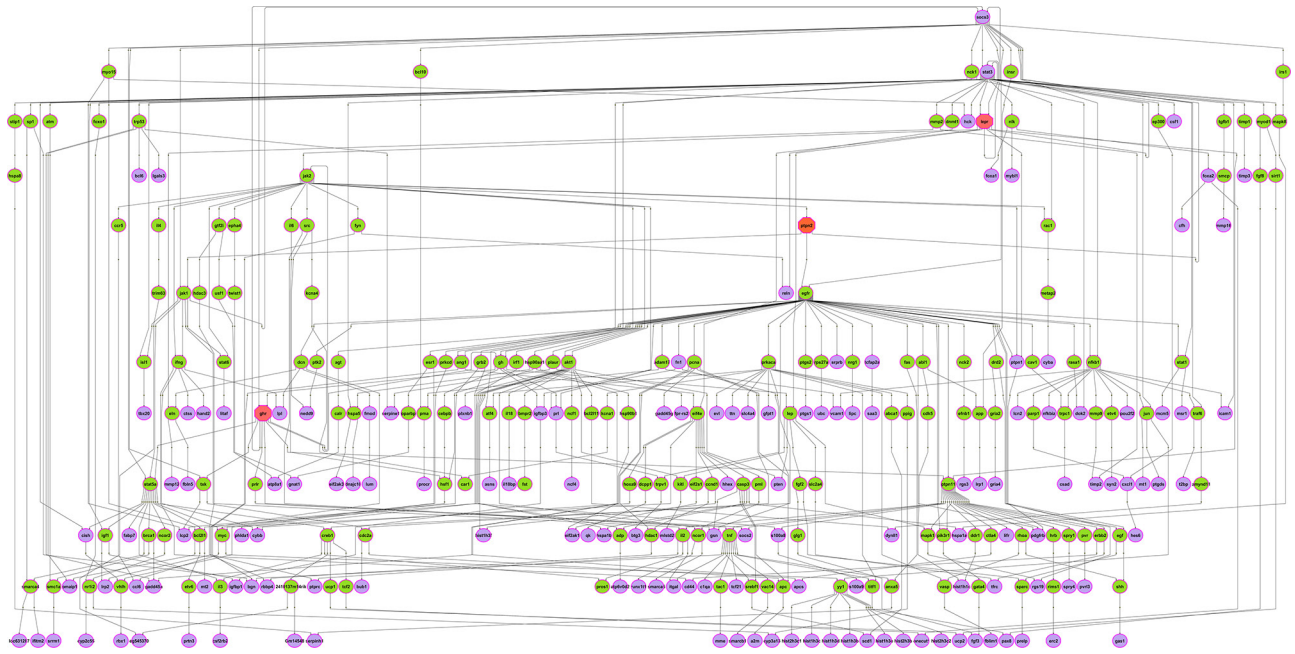

**Supplementary Figure S4: Integrated master regulatory network after single diclofenac treatment of mice.** Based on database information 3 different master regulatory networks were fused using the GeneXplain software. The color coding red, blue and green represent nodes for master regulator, regulated genes and connecting genes, respectively. The network consisted of 146 DEGs of 304 interacting partners.

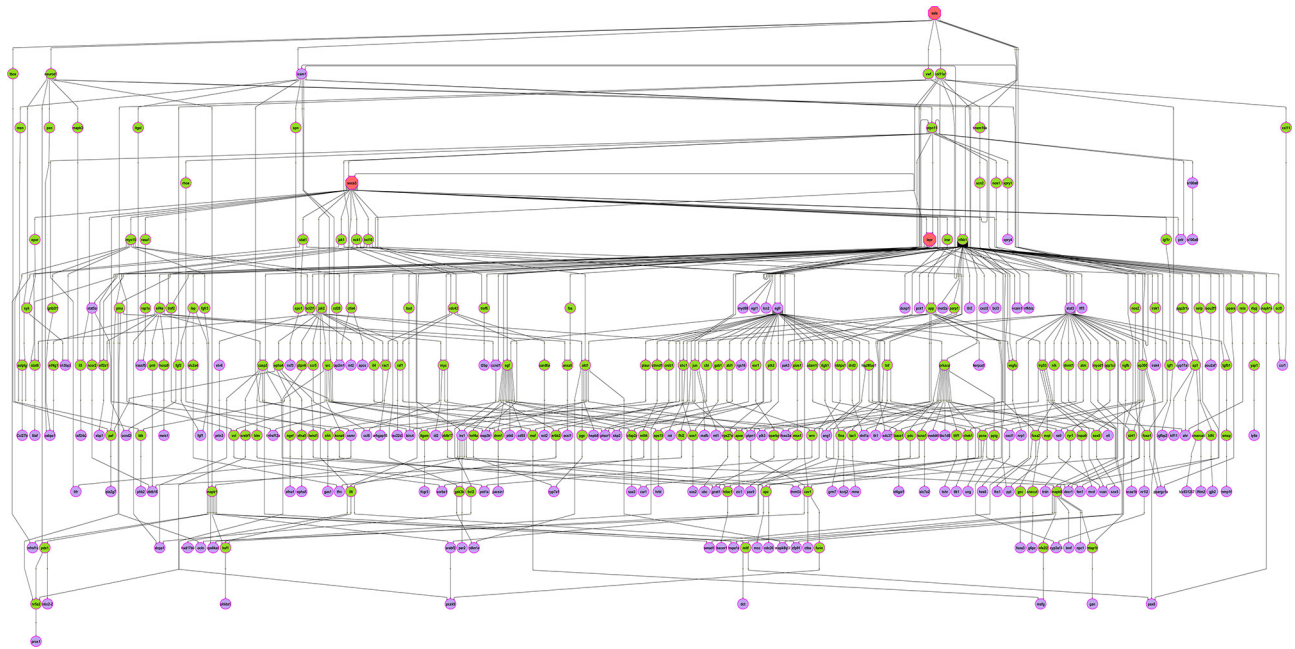

**Supplementary Figure S5: Integrated master regulatory network after repeated diclofenac treatment of mice for 3 days.** Based on database information 3 different master regulatory networks were fused using the GeneXplain software. The color coding red, blue and green represent nodes for master regulator, regulated genes and connecting genes, respectively. The network consisted of 159 DEGs of 330 interacting partners.

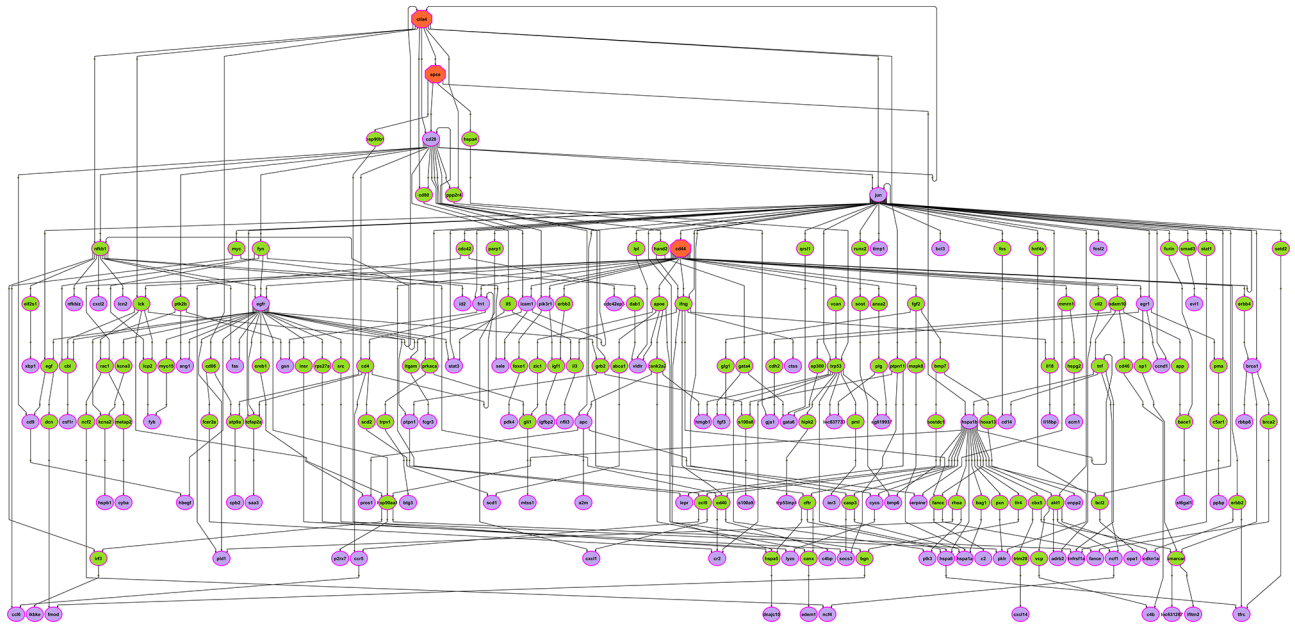

**Supplementary Figure S6: Integrated master regulatory network after repeated diclofenac treatment of mice for 14 days.** Based on database information 3 different master regulatory network were fused using the GeneXplain software. The color coding red, blue and green represent nodes for master regulator, regulated genes and connecting genes, respectively. The network consisted of 97 DEGs of 207 interacting partners.

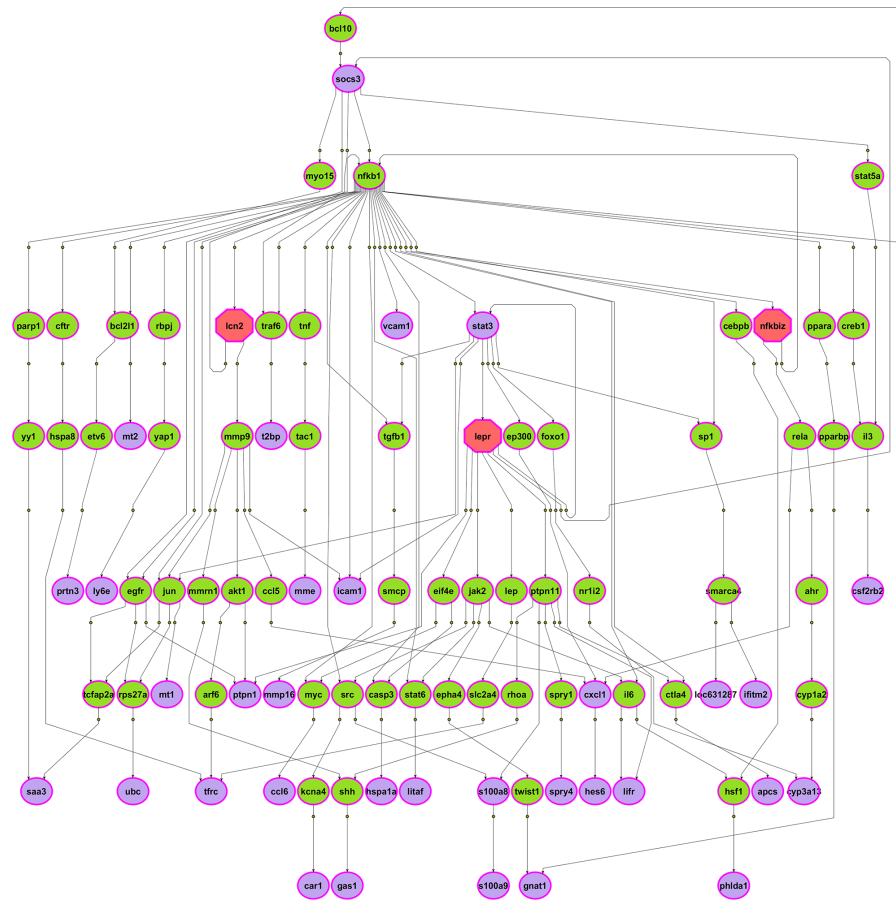

**Supplementary Figure S7: Integrated master regulatory network for genes commonly regulated after single and repeated treatment of mice for 3 days.** Based on database information 3 different master regulatory network were fused using the GeneXplain software. The color coding red, blue and green represent nodes for master regulator, regulated genes and connecting genes, respectively. The network consisted of 36 DEGs of 93 interacting partners.

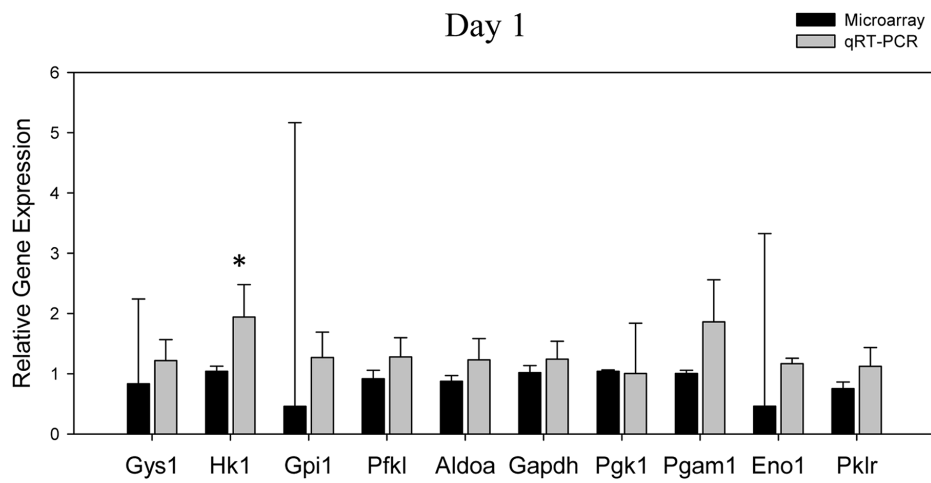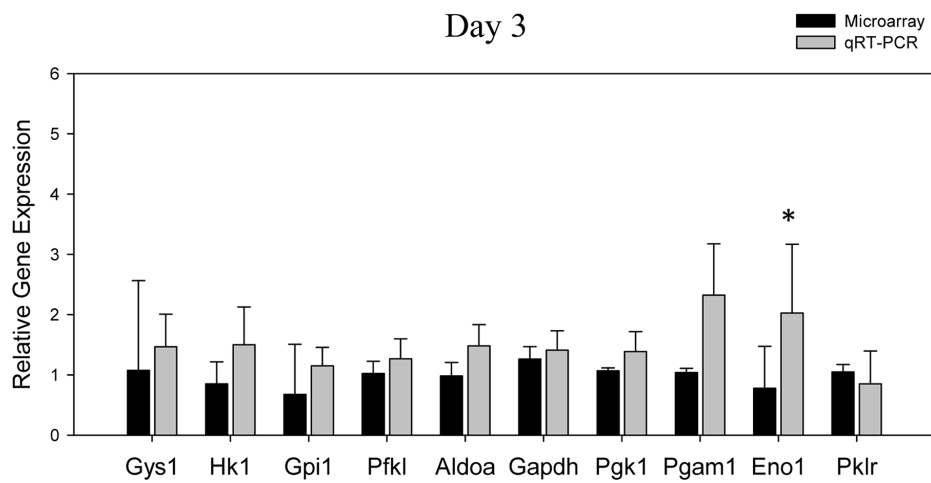

**Supplementary Figure S8: qRT-PCR of genes involved in glycogenesis and carbohydrate metabolism.** The y-axis indicates the relative fold change in expression (diclofenac-treated vs. controls). Data are means  $\pm$  SD ( $n = 3$ ). \* $P < 0.05$ , \*\* $P < 0.01$ .



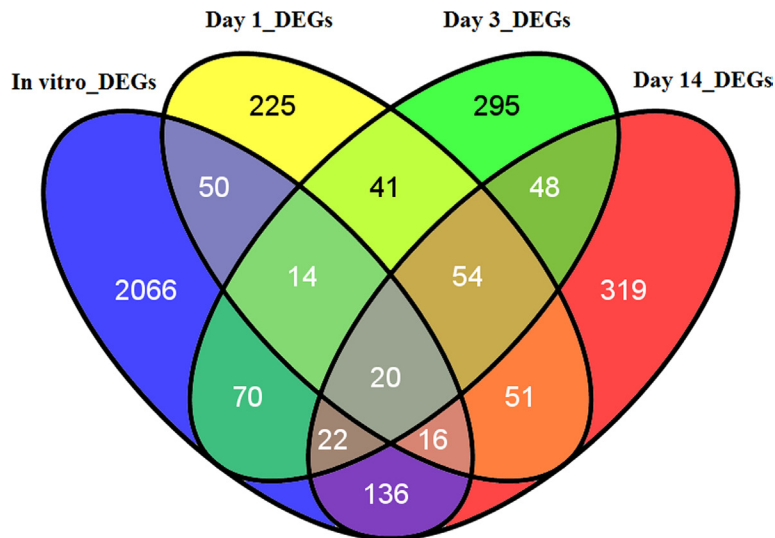

**Supplementary Figure S10: Venn diagram of DEGs obtained from *in vitro* and *in vivo* diclofenac treatment.** Twenty genes were commonly regulated in both *in vitro* and *in vivo* diclofenac treatment conditions and are given in Table S16.

**Supplementary Table S1: Primer sequences used in real-time RT-PCR analyses**

| Target         | Primer  | Primer Sequence                | Product Size (base pair) |
|----------------|---------|--------------------------------|--------------------------|
| mStat3         | Forward | 5'-TGCAGAGCAGGTATCTTGAG-3'     | 157                      |
|                | Reverse | 5'-TGCTGCTTCTCTGTCACTAC-3'     |                          |
| mLbp           | Forward | 5'-CCGGCATCCGGTTGAACACCA-3'    | 202                      |
|                | Reverse | 5'-AAGACAGGTTCCCGGGCGGA-3'     |                          |
| mFas           | Forward | 5'-CCGAATGTCGCAGAACCTTA-3'     | 150                      |
|                | Reverse | 5'-GGCAGGCTCTCTCTCTCTT-3'      |                          |
| mPtprij        | Forward | 5'-GAACACCGTGGACGTGTATG-3'     | 180                      |
|                | Reverse | 5'-GTCATTGCCGTTGTGTTCTG-3'     |                          |
| mIL-13ra1      | Forward | 5'-CTGACAGTCTTGACAGCATGG-3'    | 184                      |
|                | Reverse | 5'-CCTACAAGTTTCCAATAAGCAATG-3' |                          |
| mMyd88         | Forward | 5'-CTCCCCTGGGCTCAACCCGT-3'     | 204                      |
|                | Reverse | 5'-TGGCCAGGCCCCCTTGATGA-3'     |                          |
| mGstm3         | Forward | 5'-TCATTGGTGCCAGACCCAACC-3'    | 225                      |
|                | Reverse | 5'-GCCTGGGGCAGCTCCTTAAAC-3'    |                          |
| mRor- $\alpha$ | Forward | 5'-GGACATTAGCTGGCTGCTTC-3'     | 162                      |
|                | Reverse | 5'-CCTTGTCTGGGGTTTGTCAT-3'     |                          |
| hmr_18S rRNA   | Forward | 5'-GTAACCCGTTGAACCCATT-3'      | 151                      |
|                | Reverse | 5'-CCATCCAATCGGTAGTAGCG-3'     |                          |

**Supplementary Table S2: Lists of genes involved in immune, inflammatory and stress responses in diclofenac-treated mice liver.** The differentially expressed genes were selected from the livers of mice treated with diclofenac for 1, 3 and 14 days. Genes were sorted by biological process and gene ontology using the GenePlex and GeneXplain software.



**Supplementary Table S3: Differentially expressed genes coding for drug metabolizing enzymes in liver after single and repeated diclofenac treatment (30 mg/kg, *i.p.*)**

| <b>1 DAY</b>     |                    |                                                                                         |                            |
|------------------|--------------------|-----------------------------------------------------------------------------------------|----------------------------|
| <b>Probe ID</b>  | <b>Gene_symbol</b> | <b>Description</b>                                                                      | <b>Average Fold Change</b> |
| <b>Phase I</b>   |                    |                                                                                         |                            |
| 1419430_at       | Cyp26a1            | Cytochrome P450, family 26, polypeptide 1, subfamily a                                  | -2.23                      |
| 1422230_s_at     | Cyp2a5             | Cytochrome P450, family 2, polypeptide 5, subfamily a                                   | -1.45                      |
| 1419590_at       | Cyp2b9             | Cytochrome P450, family 2, polypeptide 9, subfamily b                                   | 1.89                       |
| 1423244_at       | Cyp2c40            | Cytochrome P450, family 2, polypeptide 40, subfamily c                                  | -1.58                      |
| 1419582_at       | Cyp2c55            | Cytochrome P450, family 2, polypeptide 55, subfamily c                                  | -1.67                      |
| 1423244_at       | Cyp2c68            | Cytochrome P450, family 2, polypeptide 68, subfamily c                                  | -1.58                      |
| 1426102_at       | Cyp2j13            | Cytochrome P450, family 2, polypeptide 13, subfamily j                                  | 2.07                       |
| 1419523_at       | Cyp3a13            | Cytochrome P450, family 3, polypeptide 13, subfamily a                                  | 1.75                       |
| <b>Phase III</b> |                    |                                                                                         |                            |
| 1456586_x_at     | Mvp                | Major vault protein                                                                     | 1.44                       |
| 1438377_x_at     | Slc13a3            | Solute carrier family 13 (sodium-dependent dicarboxylate transporter), member 3         | 2.48                       |
| 1434473_at       | Slc16a5            | Solute carrier family 16 (monocarboxylic acid transporters), member 5                   | 1.56                       |
| 1428379_at       | Slc17a6            | Solute carrier family 17 (sodium-dependent inorganic phosphate cotransporter), member 6 | 1.45                       |
| 1449215_at       | Slc22a21           | Solute carrier family 22 (organic cation transporter), member 21                        | 1.47                       |
| 1419751_x_at     | Slc22a27           | Solute carrier family 22, member 27                                                     | 1.45                       |
| 1420835_at       | Slc25a30           | Solute carrier family 25, member 30                                                     | -1.75                      |
| 1449067_at       | Slc2a2             | Solute carrier family 2 (facilitated glucose transporter), member 2                     | -1.49                      |
| 1422497_at       | Slc30a5            | Solute carrier family 30 (zinc transporter), member 5                                   | 1.52                       |
| 1448741_at       | Slc3a1             | Solute carrier family 3, member 1                                                       | 2.60                       |
| 1452445_at       | Slc41a2            | Solute carrier family 41, member 2                                                      | 3.58                       |
| 1441047_at       | Slc45a4            | Solute carrier family 45, member 4                                                      | -1.89                      |
| 1456297_at       | Slc46a2            | Solute carrier family 46, member 2                                                      | -1.42                      |
| 1434096_at       | Slc4a4             | Solute carrier family 4 (anion exchanger), member 4                                     | 1.54                       |

|            |         |                                                                                            |       |
|------------|---------|--------------------------------------------------------------------------------------------|-------|
| 1417929_at | Slc7a8  | Solute carrier family 7 (cationic amino acid transporter, y <sup>+</sup> system), member 8 | 1.67  |
| 1420379_at | Slco1a1 | Solute carrier organic anion transporter family, member 1a1                                | -1.78 |
| 1420405_at | Slco1a4 | Solute carrier organic anion transporter family, member 1a4                                | -1.49 |

**3 DAY**

| Probe ID         | Gene_symbol | Description                                                              | Average Fold Change |
|------------------|-------------|--------------------------------------------------------------------------|---------------------|
| <b>Phase I</b>   |             |                                                                          |                     |
| 1451260_at       | Aldh1b1     | Aldehyde dehydrogenase 1 family, member B1                               | 1.56                |
| 1436119_at       | Aldh1l2     | Aldehyde dehydrogenase 1 family, member L2                               | -1.62               |
| 1435371_x_at     | Ces3        | Carboxylesterase 3                                                       | -2.55               |
| 1417017_at       | Cyp17a1     | Cytochrome P450, family 17, polypeptide 1, subfamily a                   | 1.83                |
| 1419430_at       | Cyp26a1     | Cytochrome P450, family 26, polypeptide 1, subfamily a                   | -2.71               |
| 1421363_at       | Cyp2c39     | Cytochrome P450, family 2, polypeptide 39, subfamily c                   | 1.45                |
| 1418780_at       | Cyp39a1     | Cytochrome P450, family 39, polypeptide 1, subfamily a                   | 1.52                |
| 1419523_at       | Cyp3a13     | Cytochrome P450, family 3, subfamily a, polypeptide 13                   | 1.57                |
| 1426064_at       | Cyp3a44     | Cytochrome P450, family 3, polypeptide 44, subfamily a                   | 1.47                |
| 1424853_s_at     | Cyp4a10     | Cytochrome P450, family 4, polypeptide 10, subfamily a                   | -1.54               |
| 1440134_at       | Cyp4a31     | Cytochrome P450, family 4, subfamily a, polypeptide 31                   | -1.56               |
| 1422533_at       | Cyp51       | Cytochrome P450, family 51                                               | 1.69                |
| 1450646_at       | Cyp51       | Cytochrome P450, family 51                                               | 1.69                |
| 1438743_at       | Cyp7a1      | Cytochrome P450, family 7, subfamily a, polypeptide 1                    | 2.03                |
| <b>Phase II</b>  |             |                                                                          |                     |
| 1427474_s_at     | Gstm3       | Glutathione S-transferase, mu 3                                          | 1.87                |
| 1432517_a_at     | Nnmt        | Nicotinamide N-methyltransferase                                         | 1.80                |
| <b>Phase III</b> |             |                                                                          |                     |
| 1450245_at       | Slc10a2     | Solute carrier family 10, member 2                                       | 2.93                |
| 1417600_at       | Slc15a2     | Solute carrier family 15 (h <sup>+</sup> /peptide transporter), member 2 | -1.62               |
| 1434473_at       | Slc16a5     | Solute carrier family 16 (monocarboxylic acid transporters), member 5    | 1.53                |

|              |          |                                                                                |       |
|--------------|----------|--------------------------------------------------------------------------------|-------|
| 1456003_a_at | Slc1a4   | Solute carrier family 1 (glutamate/neutral amino acid transporter), member 4   | 1.52  |
| 1436162_at   | Slc22a28 | Solute carrier family 22, member 28                                            | -1.49 |
| 1450404_at   | Slc23a1  | Solute carrier family 23 (nucleobase transporters), member 1                   | 1.42  |
| 1450018_s_at | Slc25a30 | Solute carrier family 25, member 30                                            | -2.10 |
| 1424211_at   | Slc25a33 | Solute carrier family 25, member 33                                            | -1.82 |
| 1422497_at   | Slc30a5  | Solute carrier family 30 (zinc transporter), member 5                          | 1.75  |
| 1455249_at   | Slc36a4  | Solute carrier family 36 (proton/amino acid symporter), member 4               | 1.56  |
| 1426601_at   | Slc37a1  | Solute carrier family 37 (glycerol-3-phosphate transporter), member 1          | 1.96  |
| 1427035_at   | Slc39a14 | Solute carrier family 39 (zinc transporter), member 14                         | 2.00  |
| 1448741_at   | Slc3a1   | Solute carrier family 3, member 1                                              | 2.23  |
| 1460565_at   | Slc41a1  | Solute carrier family 41, member 1                                             | 1.97  |
| 1452445_at   | Slc41a2  | Solute carrier family 41, member 2                                             | 2.75  |
| 1453255_at   | Slc43a1  | Solute carrier family 43, member 1                                             | 1.45  |
| 1417022_at   | Slc7a3   | Solute carrier family 7 (cationic amino acid transporter, y+ system), member 3 | 1.79  |
| 1426068_at   | Slc7a4   | Solute carrier family 7 (cationic amino acid transporter, y+ system), member 4 | 1.58  |
| 1449844_at   | Slco1a1  | Solute carrier organic anion transporter family, member 1a1                    | -1.77 |
| 1420379_at   | Slco1a1  | Solute carrier organic anion transporter family, member 1a1                    | -1.77 |
| 1420405_at   | Slco1a4  | Solute carrier organic anion transporter family, member 1a4                    | -1.42 |

**14 DAY**

| <b>Probe ID</b>           | <b>Gene_symbol</b> | <b>Description</b>                                                           | <b>Average Fold Change</b> |
|---------------------------|--------------------|------------------------------------------------------------------------------|----------------------------|
| <b>Phase I</b>            |                    |                                                                              |                            |
| 1424576_s_at              | Cyp2c44            | Cytochrome P450, family 2, polypeptide 44, subfamily c                       | -1.44                      |
| 1424273_at,<br>1440327_at | Cyp2c70            | Cytochrome P450, family 2, polypeptide 70, subfamily c                       | 2.81                       |
| 1418780_at                | Cyp39a1            | Cytochrome P450, family 39, polypeptide 1, predicted gene 14336, subfamily a | -1.43                      |
| 1424352_at                | Cyp4a12a           | Cytochrome P450, family 4, polypeptide 12a, subfamily a                      | -1.78                      |
| 1430172_a_at              | Cyp4f16            | Cytochrome P450, family 4, polypeptide 16, predicted gene 9705, subfamily f  | 1.60                       |
| 1417071_s_at              | Cyp4v3             | Cytochrome P450, family 4, polypeptide 3, subfamily v                        | -1.42                      |

|                  |          |                                                                             |       |
|------------------|----------|-----------------------------------------------------------------------------|-------|
| 1422100_at       | Cyp7a1   | Cytochrome P450, family 7, polypeptide 1, predicted gene 12704, subfamily a | -1.89 |
| 1449309_at       | Cyp8b1   | Cytochrome P450, family 8, polypeptide 1, subfamily b                       | -1.84 |
| <b>Phase II</b>  |          |                                                                             |       |
| 1427474_s_at     | Gstm3    | Glutathione s-transferase, mu 3                                             | -1.59 |
| <b>Phase III</b> |          |                                                                             |       |
| 1428776_at       | Slc10a6  | Solute carrier family 10 (sodium/bile acid cotransporter family), member 6  | 6.63  |
| 1452653_at       | Slc25a22 | Solute carrier family 25 (mitochondrial carrier glutamate), member 22       | -1.79 |
| 1420836_at       | Slc25a30 | Solute carrier family 25, member 30                                         | -1.64 |
| 1427035_at       | Slc39a14 | Solute carrier family 39 (zinc transporter), member 14                      | 2.99  |
| 1448741_at       | Slc3a1   | Solute carrier family 3, member 1                                           | 3.76  |
| 1460565_at       | Slc41a1  | Solute carrier family 41, member 1                                          | 1.95  |
| 1452445_at       | Slc41a2  | Solute carrier family 41, member 2                                          | 7.26  |
| 1416464_at       | Slc4a1   | Solute carrier family 4 (anion exchanger), member 1                         | 1.46  |
| 1427221_at       | Slc6a20a | Solute carrier family 6 (neurotransmitter transporter), member 20a          | 1.42  |
| 1427348_at       | Slc8a2   | Solute carrier family 8 (sodium/calcium exchanger), member 2                | 1.91  |
| 1438115_a_at     | Slc9a3r1 | Solute carrier family 9 (sodium/hydrogen exchanger), member 3 regulator 1   | 1.67  |
| 1439368_a_at     | Slc9a3r2 | Solute carrier family 9 (sodium/hydrogen exchanger), member 3 regulator 2   | -1.42 |
| 1449844_at       | Slco1a1  | Solute carrier organic anion transporter family, member 1a1                 | -1.60 |
| 1420405_at       | Slco1a4  | Solute carrier organic anion transporter family, member 1a4                 | -1.54 |

**Supplementary Table S4: Enriched biological processes after single dose diclofenac treatment**

| GO ID      | Biological Process    | No of genes | Genes                                                                                                                                                                                                                                                                                                                                                                                                                                                                                                                                                                                                                                                                                                                                                                                                                                                                          | P-value                  |
|------------|-----------------------|-------------|--------------------------------------------------------------------------------------------------------------------------------------------------------------------------------------------------------------------------------------------------------------------------------------------------------------------------------------------------------------------------------------------------------------------------------------------------------------------------------------------------------------------------------------------------------------------------------------------------------------------------------------------------------------------------------------------------------------------------------------------------------------------------------------------------------------------------------------------------------------------------------|--------------------------|
| GO:0006954 | Inflammatory response | 35          | A2m, Aim2, Apcs, Cd163, Cd44, Chi3l3, Csf1, Cxcl1, Cxcl13, Cyba, Cybb, Fn1, Fpr2, Hck, Hp, Itgal, Itgb2, Itih4, Lbp, Nfkbiz, Orm1, Orm2, Prok2, Reg3b, S100a8, S100a9, Saa1, Saa2, Saa3, Saa4, Serpina3n, Stat3, Tfr, Themis2, Vcam1                                                                                                                                                                                                                                                                                                                                                                                                                                                                                                                                                                                                                                           | $4.7499 \times 10^{-12}$ |
| GO:0006955 | Immune response       | 52          | Adamdec1, Aim2, Bcl6, C1qa, C1qb, C1qc, Ccl6, Cfh, Clec4n, Csf1, Ctsc, Ctss, Cxcl1, Cxcl13, Cxcl14, Cyba, Cybb, Fcer1g, Fgf3, Hck, Herc6, Ifitm2, Il18bp, Il2rg, Itgb2, Lbp, Lcn2, Lcp2, Lgals3, Lgmn, Liltrb3, March1, Marco, Ncf4, Orm1, Pdgfrb, Pou2f2, Prg4, Procr, Pros1, Prss3, Pten, Raet1d, Raet1e, S100a8, S100a9, Saa1, Trat1, Tyrobp, Ubc, Vsig4, Zbp1                                                                                                                                                                                                                                                                                                                                                                                                                                                                                                              | $2.7604 \times 10^{-10}$ |
| GO:0006950 | Response to stress    | 112         | A2m, Aim2, Apcs, Asns, Bcl6, Btg3, C1qa, C1qb, C1qc, Car3, Cd163, Cd44, Cd5l, Cfh, Chi3l3, Clec2h, Clec4n, Col3a1, Cotl1, Csf1, Ctss, Cxcl1, Cxcl13, Cyba, Cybb, Derl1, Dnajb9, Dnajc10, Eif2ak1, Eif2ak3, Fabp5, Fcer1g, Fgf3, Fmod, Fn1, Fpr2, Gabra5, Gadd45a, Gadd45g, Gbp3, Gck, Gfpt1, Gsn, Gsta4, Hamp2, Hck, Herc6, Hhex, Hist2h2be, Hp, Hsd3b2, Hspa1a, Hspa1b, Icam1, Ifitm2, Igfbp1, Il18bp, Inhbb, Itgal, Itgb2, Itih4, Lbp, Lcn2, Lcp2, Lepr, Lgals3, Lgmn, Liltrb3, Lipc, Lpl, Marco, Mnda, Nfkbiz, Nrep, Orm1, Orm2, Pdgfrb, Plac8, Pmaip1, Prl, Prok2, Pros1, Prss3, Pten, Ptgs1, Ptpn1, Ptprc, Raet1d, Raet1e, Rbm3, Rbx1, Reg3b, Reln, Rnasel, S100a8, S100a9, Saa1, Saa2, Saa3, Saa4, Scara5, Scd1, Serpina3n, Serpine1, Serpine2, Serpinh1, Sfpq, Smarca5, Smarcb1, Socs3, Srprb, Stat3, Tfp2a, Tfr, Themis2, Trat1, Tyrobp, Ubc, Ucp2, Vcam1, Vsig4, Zbp1 | $6.3248 \times 10^{-15}$ |
| GO:0009611 | Response to wounding  | 45          | A2m, Aim2, Apcs, Cd163, Cd44, Chi3l3, Col3a1, Csf1, Cxcl1, Cxcl13, Cyba, Cybb, Fabp5, Fmod, Fn1, Fpr2, Gsn, Hck, Hhex, Hp, Itgal, Itgb2, Itih4, Lbp, Nfkbiz, Nrep, Orm1, Orm2, Pdgfrb, Prok2, Reg3b, Reln, S100a8, S100a9, Saa1, Saa2, Saa3, Saa4, Serpina3n, Serpine1, Serpine2, Stat3, Tfr, Themis2, Vcam1                                                                                                                                                                                                                                                                                                                                                                                                                                                                                                                                                                   | $1.0954 \times 10^{-12}$ |
| GO:0006953 | Acute-phase response  | 17          | A2m, Apcs, Cd163, Fn1, Hp, Itih4, Lbp, Orm1, Orm2, Reg3b, Saa1, Saa2, Saa3, Saa4, Serpina3n, Stat3, Tfr                                                                                                                                                                                                                                                                                                                                                                                                                                                                                                                                                                                                                                                                                                                                                                        | $2.0155 \times 10^{-16}$ |

|            |                               |     |                                                                                                                                                                                                                                                                                                                                                                                                                                                                                                                                                                                                                                                                                                                                                                                                                                                                                                                                                                                                                                                                                                                                                                                                                                                                                                                                                                                                                                                                                                                                                                                                                                                                                                                                                                                              |                         |
|------------|-------------------------------|-----|----------------------------------------------------------------------------------------------------------------------------------------------------------------------------------------------------------------------------------------------------------------------------------------------------------------------------------------------------------------------------------------------------------------------------------------------------------------------------------------------------------------------------------------------------------------------------------------------------------------------------------------------------------------------------------------------------------------------------------------------------------------------------------------------------------------------------------------------------------------------------------------------------------------------------------------------------------------------------------------------------------------------------------------------------------------------------------------------------------------------------------------------------------------------------------------------------------------------------------------------------------------------------------------------------------------------------------------------------------------------------------------------------------------------------------------------------------------------------------------------------------------------------------------------------------------------------------------------------------------------------------------------------------------------------------------------------------------------------------------------------------------------------------------------|-------------------------|
| GO:0008152 | Metabolic process             | 243 | 4930444A02Rik, A2m, Acpp, Acs13, Acsm2, Adamdec1, Adamts2, Adamts9, Adck3, Afnid, Agxt211, Akr1c14, Aldh18a1, Alox5ap, Ang2, Apcs, Arid5b, Art3, Asns, B3galt1, Bcl6, Bgn, Bub1, C1qa, C1qb, C1qc, Car1, Car13, Car3, Ccnt2, Cd44, Cers6, Ces1d, Ces1e, Ces1f, Cfh, Chi313, Cish, Col14a1, Col3a1, Cp, Cpd, Cryl1, Csad, Ctsc, Ctsj, Ctss, Cyb561, Cyba, Cybb, Cyp26a1, Cyp2a5, Cyp2b9, Cyp2c40, Cyp2c55, Cyp2c68, Cyp2j13, Cyp3a13, Dbp, Der11, Dgkb, Dnajb9, Dnajc10, Dynl11, Efemp1, Ehf, Eif1a, Eif2ak1, Eif2ak3, Fabp2, Fabp5, Far1, Fblim1, Fmod, Fn1, Foxa1, Foxa2, Fpr2, Gadd45a, Gadd45g, Galnt2, Gbp3, Gck, Gfpt1, Ghr, Gm10639, Gmppb, Gnat1, Gpc6, Gsta1, Gsta2, Gsta3, Gsta4, Gstm6, Gstt3, Hand2, Hck, Hectd2, Herc6, Hes6, Hhex, Hp, Hs6st2, Hsd3b2, Hsd3b3, Hsd3b5, Hsd3b6, Hspa1a, Hspa1b, Htra1, Ifi205, Igfbp1, Igfbp3, Il33, Inmt, Ip6k1, Isyna1, Itgb8, Itih3, Itih4, Kif5a, Klk1b26, Klk4, Ldhd, Lepr, Lgals3, Lgmn, Lhx2, Lhx6, Lipc, Lipm, Lipo1, Litaf, Lox11, Lpl, Lrat, Lrp1, Lrp2, Lum, Ly6e, Lyz16, Magi3, March1, Mcm5, Me2, Mesdc2, Mettl13, Mme, Mmp12, Mmp16, Mnda, Mtx2, Mybl1, Ncf4, Nfkbiz, Nnmt, Nova1, Nudt10, Nudt11, Ogn, Onecut1, Ostc, Papss2, Pax4, Pax8, Pcgf6, Pdgfrb, Phlda1, Pmaip1, Pou2f2, Prelp, Prosl, Prss23, Prss3, Prtn3, Pten, Ptgds, Ptgs1, Ptpn1, Ptpn2, Ptpc, Ptprg, Qk, Qsox1, Rab30, Rbbp4, Rbm3, Rbx1, Reln, Rgs19, Rhobtb3, Rnasel, Rora, Rpl39l, Rps10, Rrbp1, Runx1t1, S100a8, S100a9, Saa1, Scd1, Sdr9c7, Sec61g, Serpina12, Serpina6, Serpine1, Serpinh1, Sfpq, Shmt1, Slc2a2, Slc3a1, Slc7a8, Smarca5, Smarcb1, Smek2, Snapc2, Soat1, Socs2, Socs3, Sqle, Srprb, Srrm1, Stat3, Steap4, Stk31, Stt3a, Tbx20, Tcf21, Tfap2a, Tfrc, Tgm1, Tmprss11d, Tsc22d1, Tspan8, Ttn, Tuba8, Tyrobp, Ubc, Ucp2, Ugp2, Upp2, Vsig4, Zic3 | $2.3996 \times 10^{-6}$ |
| GO:0006805 | Xenobiotic metabolic process  | 10  | Cyp26a1, Gsta1, Gsta2, Gsta3, Gsta4, Hsd3b2, Nnmt, Papss2, Ptgs1, Ugp2                                                                                                                                                                                                                                                                                                                                                                                                                                                                                                                                                                                                                                                                                                                                                                                                                                                                                                                                                                                                                                                                                                                                                                                                                                                                                                                                                                                                                                                                                                                                                                                                                                                                                                                       | $3.7531 \times 10^{-4}$ |
| GO:0006629 | Lipid metabolic process       | 42  | Acs13, Acsm2, Akr1c14, Alox5ap, B3galt1, Cers6, Ces1d, Ces1f, Cryl1, Cyp26a1, Cyp2c55, Fabp2, Fabp5, Far1, Ghr, Gpc6, Hsd3b2, Hsd3b3, Hsd3b5, Hsd3b6, Ip6k1, Isyna1, Itgb8, Lepr, Lgmn, Lipc, Lipm, Lipo1, Lpl, Lrat, Lrp1, Lrp2, Pdgfrb, Pten, Ptgds, Ptgs1, Qk, Saa1, Scd1, Serpina6, Soat1, Sqle                                                                                                                                                                                                                                                                                                                                                                                                                                                                                                                                                                                                                                                                                                                                                                                                                                                                                                                                                                                                                                                                                                                                                                                                                                                                                                                                                                                                                                                                                          | $4.7674 \times 10^{-4}$ |
| GO:0008203 | Cholesterol metabolic process | 6   | Lepr, Lipc, Lrp1, Saa1, Soat1, Sqle                                                                                                                                                                                                                                                                                                                                                                                                                                                                                                                                                                                                                                                                                                                                                                                                                                                                                                                                                                                                                                                                                                                                                                                                                                                                                                                                                                                                                                                                                                                                                                                                                                                                                                                                                          | 0.03225                 |
| GO:0006631 | Fatty acid metabolic process  | 15  | Acs13, Acsm2, Alox5ap, Ces1d, Ces1f, Cryl1, Fabp2, Far1, Ghr, Lipc, Lpl, Ptgds, Ptgs1, Qk, Scd1                                                                                                                                                                                                                                                                                                                                                                                                                                                                                                                                                                                                                                                                                                                                                                                                                                                                                                                                                                                                                                                                                                                                                                                                                                                                                                                                                                                                                                                                                                                                                                                                                                                                                              | 0.00203                 |

|            |                                                               |    |                                                                                                                                                                                                                                                                                                                                |                         |
|------------|---------------------------------------------------------------|----|--------------------------------------------------------------------------------------------------------------------------------------------------------------------------------------------------------------------------------------------------------------------------------------------------------------------------------|-------------------------|
| GO:0042981 | Regulation of apoptotic process                               | 46 | Asns, Bcl6, Bmp5, Cd44, Cxcl13, Dnajb9, Dynl1, Eif2ak3, Fcer1g, Fn1, Gabra5, Gas1, Hand2, Hck, Hspa1a, Hspa1b, Igfbp3, Inhbb, Lcn2, Lgmn, Lifr, Lrp1, Mnda, Mt1, Pax4, Pax8, Pdgfrb, Phlda1, Plac8, Pmaip1, Prok2, Pten, Ptgfr, Ptprc, S100a8, S100a9, Serpine1, Six4, Slc46a2, Socs2, Socs3, Tfp2a, Timp3, Tsc22d1, Ubc, Ucp2 | 0.00189                 |
| GO:0019221 | Cytokine-mediated signaling pathway                           | 23 | Aim2, Cd44, Cish, Csf2rb, Csf2rb2, Cxcl13, Ghr, Hck, Icam1, Ifitm2, Il13ra1, Il2rg, Lepr, Lifr, Lilrb3, Ptpn1, Ptpn2, Rnasel, Socs3, Stat3, Ubc, Vcam1, Xaf1                                                                                                                                                                   | $2.6155 \times 10^{-7}$ |
| GO:0060397 | JAK-STAT cascade involved in growth hormone signaling pathway | 7  | Cish, Ghr, Prl, Ptpn1, Socs2, Socs3, Stat3                                                                                                                                                                                                                                                                                     | $2.275 \times 10^{-7}$  |
| GO:0007229 | Integrin-mediated signaling pathway                           | 12 | Adamts2, Adamts9, Col3a1, Fcer1g, Hck, Itga4, Itga8, Itgal, Itgb2, Itgb8, Nedd9, Tyrobp                                                                                                                                                                                                                                        | $4.6443 \times 10^{-6}$ |
| GO:0060333 | Interferon-gamma-mediated signaling pathway                   | 7  | Cd44, Hck, Icam1, Ptpn1, Ptpn2, Socs3, Vcam1                                                                                                                                                                                                                                                                                   | $3.525 \times 10^{-5}$  |

The functional properties of DEGs were analysed using the GeneXplain platform and the *p*-value threshold was set as  $< 0.05$ .

**Supplementary Table S5: Enriched biological processes after repeated treatment for 3 days**

| GO ID      | Biological Process    | No of genes | Genes                                                                                                                                                                                                                                                                                                                                                                                                                                                                                                                                                                                                                                                                                                                                                                                                                                                                                                                                             | P-value                  |
|------------|-----------------------|-------------|---------------------------------------------------------------------------------------------------------------------------------------------------------------------------------------------------------------------------------------------------------------------------------------------------------------------------------------------------------------------------------------------------------------------------------------------------------------------------------------------------------------------------------------------------------------------------------------------------------------------------------------------------------------------------------------------------------------------------------------------------------------------------------------------------------------------------------------------------------------------------------------------------------------------------------------------------|--------------------------|
| GO:0006954 | Inflammatory response | 37          | Adora2a, Apes, B4galt1, Ccr1, Chi3l3, Chi3l4, Chst4, Cxcl1, Cxcl13, Cxcl2, Fcgr3, Hp, Il1rn, Itih4, Lbp, Myd88, Nfkbiz, Orm1, Orm2, Pla2g4c, Pla2g7, Plscr1, Rps6ka5, S100a8, S100a9, Saa1, Saa2, Saa3, Saa4, Serpina3n, Smad1, Stat3, Tfr, Tirap, Tlr2, Tnfrsf1a, Vcam1                                                                                                                                                                                                                                                                                                                                                                                                                                                                                                                                                                                                                                                                          | $1.4121 \times 10^{-11}$ |
| GO:0006955 | Immune response       | 44          | Adcy9, Apoa4, Bcl3, Ccl6, Ccr1, Cd55, Chst4, Ctsc, Cxcl1, Cxcl13, Cxcl2, Egfr, Fcgr3, Fgf1, Foxo3, Ifitm2, Il1r1, Il1r2, Il1rn, Irak4, Irgm1, Irs1, Lax1, Lbp, Lcn2, Map3k1, Mapkapk3, Marco, Myd88, Nrg4, Orm1, Plscr1, Pou2af1, Prg4, Rps6ka5, S100a8, S100a9, Saa1, St6gall, Tirap, Tlr2, Trib3, Ubc, Xbp1                                                                                                                                                                                                                                                                                                                                                                                                                                                                                                                                                                                                                                     | $2.9585 \times 10^{-5}$  |
| GO:0006950 | Response to stress    | 130         | Aacs, Acot2, Adcy9, Adora2a, Adora2b, Ahr, Alas1, Ang, Apes, Apoa4, B4galt1, Bcl3, Btg1, Cacna1b, Ccnd1, Ccr1, Cd55, Cdkn1a, Chi3l3, Chi3l4, Chl1, Chst4, Clec2h, Creb3l2, Cry1, Cxcl1, Cxcl13, Cxcl2, Cyp17a1, Dhcr24, Dnaja3, Drd1a, Dusp1, Ect2, Egfr, Egr1, Eme2, F13a1, Fabp5, Fcgr3, Fen1, Fgf1, Fgfr1op2, Fnip1, Fnip2, Foxa3, Foxo3, Grm7, Gstm3, Herpud1, Hmgcs2, Hp, Hspal1a, Hspb8, Icam1, Id2, Id3, Ifi47, Ifitm2, Igfbp2, Il1r1, Il1rn, Immt, Irak4, Irgm1, Irgm2, Irs1, Itih4, Lbp, Lcn2, Leap2, Lepr, Map3k1, Mapk8ip3, Mapkapk3, Marco, Myd88, Nedd4l, Nek6, Nfkbiz, Nrep, Nrg4, Nrp1, Orm1, Orm2, Pax6, Pcsk9, Pla2g4c, Pla2g7, Plac8, Plk3, Plscr1, Pnliprp2, Ppargc1a, Ppargc1b, Psm2, Ptpn1, Ret, Rps6ka5, S100a8, S100a9, Saa1, Saa2, Saa3, Saa4, Scara5, Sell, Serpina3n, Sgk2, Smad1, Socs3, Srd5a1, Sreb2, Stat3, Tardbp, Tbx3, Tff3, Tfr, Tirap, Tlk1, Tlr2, Tnfrsf1a, Trib3, Tsc22d3, Ubc, Ung, Vcam1, Vcan, Xbp1, Xiap | $4.1282 \times 10^{-13}$ |
| GO:0009611 | Response to wounding  | 49          | Adora2a, Apes, Apoa4, B4galt1, Ccr1, Chi3l3, Chi3l4, Chl1, Chst4, Cxcl1, Cxcl13, Cxcl2, F13a1, Fabp5, Fcgr3, Fgfr1op2, Hp, Id3, Il1rn, Itih4, Lbp, Map3k1, Myd88, Nfkbiz, Nrep, Nrp1, Orm1, Orm2, Pax6, Pla2g4c, Pla2g7, Plscr1, Rps6ka5, S100a8, S100a9, Saa1, Saa2, Saa3, Saa4, Serpina3n, Smad1, Stat3, Tff3, Tfr, Tirap, Tlr2, Tnfrsf1a, Vcam1, Vcan                                                                                                                                                                                                                                                                                                                                                                                                                                                                                                                                                                                          | $8.4639 \times 10^{-13}$ |
| GO:0006953 | Acute-phase response  | 15          | Apes, Hp, Il1rn, Itih4, Lbp, Orm1, Orm2, Plscr1, Saa1, Saa2, Saa3, Saa4, Serpina3n, Stat3, Tfr                                                                                                                                                                                                                                                                                                                                                                                                                                                                                                                                                                                                                                                                                                                                                                                                                                                    | $7.7878 \times 10^{-13}$ |



|            |                              |     |                                                                                                                                                                                                                                                                                                                                                                                                                                                                                                                                                                                                                                                                                                                                                                                                                                                                                                                                                                                                                                                                                                                                                                                                                                                                                                                                                                                                                                                                                                                                                                                                                                                                                                                                                                                                                                                                                                                                                                                                                                                                                                                                                                                |                           |
|------------|------------------------------|-----|--------------------------------------------------------------------------------------------------------------------------------------------------------------------------------------------------------------------------------------------------------------------------------------------------------------------------------------------------------------------------------------------------------------------------------------------------------------------------------------------------------------------------------------------------------------------------------------------------------------------------------------------------------------------------------------------------------------------------------------------------------------------------------------------------------------------------------------------------------------------------------------------------------------------------------------------------------------------------------------------------------------------------------------------------------------------------------------------------------------------------------------------------------------------------------------------------------------------------------------------------------------------------------------------------------------------------------------------------------------------------------------------------------------------------------------------------------------------------------------------------------------------------------------------------------------------------------------------------------------------------------------------------------------------------------------------------------------------------------------------------------------------------------------------------------------------------------------------------------------------------------------------------------------------------------------------------------------------------------------------------------------------------------------------------------------------------------------------------------------------------------------------------------------------------------|---------------------------|
| GO:0008152 | Metabolic process            | 291 | <p>4930444A02Rik, Aacs, Acaa1a, Acaa1b, Acnat2, Acot1, Acot2, Acpp, Acs11, Adck3, Adcy9, Adora2a, Agbl4, Agpat6, Agxt211, Ahr, Alas1, Aldh18a1, Aldh1b1, Ang, Apcs, Apoa4, Arid5b, Arsj, Atat1, Atp1a2, B3galt1, B3galt2, B3gnt5, B4galnt4, B4galt1, Bcl3, Btg1, Car1, Car13, Car8, Ccnd1, Cd55, Cdc20, Cdkn1a, Cers6, Ces1d, Ces1e, Chi3l3, Chi3l4, Chst4, Chsy3, Clgn, Cml2, Creb3l2, Cry1, Ctbs, Ctsc, Ctsj, Cux2, Cyb561, Cyp17a1, Cyp26a1, Cyp2c39, Cyp39a1, Cyp3a13, Cyp3a44, Cyp4a10, Cyp4a31, Cyp51, Cyp7a1, Det, Ddc, Decr1, Dhcr24, Dhcr7, Dnaja3, Dner, Dnm3, Dnmt3a, Dpys, Drd1a, Duspl, Egfr, Egr1, Eif1a, Ell, Elovl2, Eme2, Epha5, Etv6, Evala, F13a1, Fabp2, Fabp4, Fabp5, Fbxo21, Fdps, Fen1, Fnip2, Foxa3, Foxo3, G6pc, Gan, Gnat1, Gnpdal, Grpel2, Gstm3, Gstt3, Gzmd, Gzmf, Heatr1, Herpud1, Hes6, Hivep3, Hmgcs1, Hmgcs2, Hnrpdl, Hp, Hs6st2, Hsd17b6, Hsd17b7, Hsd3b5, Hspa1a, Id3, Idi1, Igfbp2, Igtf, Il1rn, Il33, Inmt, Irak4, Irf2bp2, Irgm1, Irgm2, Irs1, Isyna1, Itih3, Itih4, Klf11, Klf17, Lepr, Lhx1, Lin28a, Litaf, Lnx1, Lpgat1, Lpin1, Lpin2, Ly6e, Mafb, Maff, Mafg, Map3k1, Mapk8ip3, Mapkapk3, March7, Mast3, Mat2a, Mcm10, Meis1, Mme, Mmp16, Mucl1, Mvd, Myd88, Nars2, Nedd4l, Nek6, Nfkbiz, Nkx2-2, Nnmt, Nop58, Nova1, Npc1, Nqo2, Nr1i2, Nt5c3, Ocln, Pabpc1, Pak3, Pax6, Pax9, Pck1, Pcsk9, Pdpr, Peg3, Per2, Phb2, Phlda1, Pknox1, Pla2g4c, Pla2g7, Plk3, Plrg1, Plscr1, Pnliprp2, Pot1a, Pou2af1, Ppargc1a, Ppargc1b, Ppp1r3b, Prdm5, Prkag2, Prlr, Prox1, Prtn3, Psmd2, Pspc1, Psph, Ptk6, Ptp4a1, Ptpn1, Ptpnd, Qpct, Qsox1, Rab40b, Rbp1, Ret, Retsat, Rnf152, Rpl22, Rpl39l, Rps6ka5, Rrp1b, S100a8, S100a9, Saa1, Sars2, Sc4mol, Scml4, Scyl3, Sgk2, Skor1, Skp2, Slc10a2, Slc23a1, Slc30a5, Slc3a1, Slc7a2, Smad1, Socs3, Sox3, Sox5, Spam1, Spsb4, Sqle, Srd5a1, Srebf2, Srsf12, St3gal1, St3gal4, St3gal5, St6gal1, Stat3, Stat5a, Steap4, Stk31, Sult1e1, Tardbp, Tbr1, Tbx3, Tef, Tfrc, Tgm1, Tk1, Tle3, Tlk1, Tlr2, Tmprss11g, Tmprss2, Tnfrsf1a, Tor3a, Trak2, Treh, Trib3, Tsc22d1, Tspan8, Ttl, Ttl7, Tubb2b, Tubb6, Ubc, Ung, Upp2, Usp2, Usp36, Vcan, Xbp1, Xiap, Zbtb16, Zcchc11, Zfp143, Zfp91, Zic1, Znrd1</p> | 2.169 × 10 <sup>-9</sup>  |
| GO:0006805 | Xenobiotic metabolic process | 11  | <p>Acs11, Ahr, Cyp17a1, Cyp26a1, Cyp39a1, Cyp7a1, Gstm3, Mat2a, Nnmt, Nr1i2, Sult1e1</p>                                                                                                                                                                                                                                                                                                                                                                                                                                                                                                                                                                                                                                                                                                                                                                                                                                                                                                                                                                                                                                                                                                                                                                                                                                                                                                                                                                                                                                                                                                                                                                                                                                                                                                                                                                                                                                                                                                                                                                                                                                                                                       | 2.8224 × 10 <sup>-4</sup> |

|            |                                                               |    |                                                                                                                                                                                                                                                                                                                                                                                                                                                                                                                                                                   |                          |
|------------|---------------------------------------------------------------|----|-------------------------------------------------------------------------------------------------------------------------------------------------------------------------------------------------------------------------------------------------------------------------------------------------------------------------------------------------------------------------------------------------------------------------------------------------------------------------------------------------------------------------------------------------------------------|--------------------------|
| GO:0006629 | Lipid metabolic process                                       | 73 | Aacs, Acaa1a, Acaa1b, Acnat2, Acot1, Acot2, Acsl1, Agpat6, Alas1, Ang, Apoa4, Arsj, B3galt1, B3gnt5, Cers6, Ces1d, Cyp17a1, Cyp26a1, Cyp39a1, Cyp4a10, Cyp51, Cyp7a1, Decr1, Dhcr24, Dhcr7, Drd1a, Egfr, Elovl2, Fabp2, Fabp4, Fabp5, Fdps, G6pc, Hmgcs1, Hmgcs2, Hsd17b6, Hsd17b7, Hsd3b5, Idi1, Il1rn, Irs1, Isyna1, Lepr, Lpgat1, Lpin1, Lpin2, Mvd, Npc1, Nr1i2, Pck1, Pcsk9, Pla2g4c, Pla2g7, Plscr1, Pnliprp2, Ppargc1a, Ppargc1b, Prkag2, Prlr, Rbp1, Retsat, Saa1, Sc4mol, Slc10a2, Sqle, Srd5a1, Srebf2, St3gal5, Stat5a, Sult1e1, Tlr2, Tnfrsf1a, Trib3 | $7.779 \times 10^{-14}$  |
| GO:0008203 | Cholesterol metabolic process                                 | 18 | Apoa4, Cyp39a1, Cyp51, Cyp7a1, Dhcr24, Dhcr7, Fdps, Hmgcs1, Hmgcs2, Hsd17b7, Idi1, Lepr, Mvd, Npc1, Pcsk9, Saa1, Sqle, Srebf2                                                                                                                                                                                                                                                                                                                                                                                                                                     | $2.3867 \times 10^{-10}$ |
| GO:0006631 | Fatty acid metabolic process                                  | 23 | Aacs, Acaa1a, Acaa1b, Acnat2, Acot1, Acot2, Acsl1, Agpat6, Ces1d, Cyp4a10, Decr1, Elovl2, Fabp2, Fabp4, Lpin1, Lpin2, Pla2g4c, Ppargc1a, Prkag2, Sc4mol, Stat5a, Tlr2, Tnfrsf1a                                                                                                                                                                                                                                                                                                                                                                                   | $1.551 \times 10^{-6}$   |
| GO:0008219 | Cell death and apoptosis                                      | 47 | 1810011O10Rik, Adck3, Adora2a, Ahr, Ang, Bmf, Ccl6, Ccl2, Cxcl2, Dhcr24, Dnaja3, Ect2, Eva1a, Fgd4, Foxo3, Gan, Gas1, Gzmd, Gzmf, Hspb8, Klf11, Lcn2, Litaf, Nek6, Ocln, Pcsk9, Peg3, Phlda1, Plekhf1, Plk3, Plscr1, Ppargc1a, Psmd2, Rassf5, Rnf152, S100a8, S100a9, Slit2, Sos2, Tardbp, Tnfrsf12a, Tnfrsf1a, Trib3, Ubc, Xiap, Zbtb16, Zc3h12a                                                                                                                                                                                                                 | $9.7358 \times 10^{-5}$  |
| GO:0019221 | Cytokine-mediated signaling pathway                           | 26 | Acsl1, Ccr1, Csf2rb, Csf2rb2, Cxcl13, Egr1, Icam1, Ifitm2, Il13ra1, Il1r1, Irak4, Lepr, Lifr, Myd88, Osmr, Prlr, Ptpn1, Rps6ka5, Socs3, Stat3, Stat5a, Tirap, Tnfrsf1a, Ubc, Vcam1, Zcchc11                                                                                                                                                                                                                                                                                                                                                                       | $6.1013 \times 10^{-8}$  |
| GO:0060397 | JAK-STAT cascade involved in growth hormone signaling pathway | 6  | Irs1, Prlr, Ptpn1, Socs3, Stat3, Stat5a                                                                                                                                                                                                                                                                                                                                                                                                                                                                                                                           | $1.0702 \times 10^{-5}$  |
| GO:0097190 | Apoptotic signaling pathway                                   | 14 | Bcl3, Bmf, Cdkn1a, Ccl2, Ect2, Fgd4, Fnip2, Foxo3, Plscr1, Sos2, Tnfrsf1a, Trib3, Ubc, Xiap                                                                                                                                                                                                                                                                                                                                                                                                                                                                       | 0.01141                  |

The functional properties of DEGs were analysed using the GeneXplain platform and the *p*-value threshold was set as < 0.05.

**Supplementary Table S6: Enriched biological processes after repeated diclofenac treatment for 14 days**

| GO ID      | Biological process    | No. of hits | Genes                                                                                                                                                                                                                                                                                                                                                                                                                                                                                                                                                                                                                                                                                                                                                                                                                                                                                                                                                                                                                                                                                                                                                                                                        | <i>p</i> -value        |
|------------|-----------------------|-------------|--------------------------------------------------------------------------------------------------------------------------------------------------------------------------------------------------------------------------------------------------------------------------------------------------------------------------------------------------------------------------------------------------------------------------------------------------------------------------------------------------------------------------------------------------------------------------------------------------------------------------------------------------------------------------------------------------------------------------------------------------------------------------------------------------------------------------------------------------------------------------------------------------------------------------------------------------------------------------------------------------------------------------------------------------------------------------------------------------------------------------------------------------------------------------------------------------------------|------------------------|
| GO:0006954 | Inflammatory response | 50          | A2m, Aoc3, Apcs, Ass1, B4galt1, Bmp6, C4b, Camk1d, Ccr5, Cd14, Cd163, Cd44, Chi3l3, Csf1r, Cxcl1, Cxcl13, Cxcl2, Cyba, Ddt, Ecm1, Fcgr3, Fn1, Gja1, Hmgb1, Hp, Il1rn, Itih4, Lbp, Ly75, Mecom, Mgl1, Ncf1, Nfkbiz, Orm1, Orm2, P2rx7, Reg3b, Reg3g, S100a9, Saa1, Saa2, Saa3, Saa4, Sele, Serpina3n, Serpinf2, Stat3, Tfr, Tlr13, Tnfrsf1a                                                                                                                                                                                                                                                                                                                                                                                                                                                                                                                                                                                                                                                                                                                                                                                                                                                                   | $2.73 \times 10^{-18}$ |
| GO:0006955 | Immune response       | 62          | Apoa4, Bcl3, Bmp6, C1qb, C2, C4b, C4bp, Ccl6, Ccl9, Ccr5, Cd14, Cd28, Clec4n, Cr2, Csf1r, Ctss, Cxcl1, Cxcl13, Cxcl14, Cxcl2, Cyba, Egfr, Enpp2, Fas, Fcgr3, Fgf3, Fyb, Hamp, Hbegf, Herc6, Hmgb1, Ifitm2, Ifitm3, Iigp1, Ikbke, Il18bp, Il1r1, Il1rn, Jun, Lbp, Lcn2, Ly75, March1, Marco, Mbl1, Ncf1, Ncf4, Nfil3, Orm1, P2rx7, Pik3r1, Prg4, Pros1, S100a9, Saa1, Sarm1, St6gal1, Tlr13, Tnfaip8l2, Vsig4, Xbp1                                                                                                                                                                                                                                                                                                                                                                                                                                                                                                                                                                                                                                                                                                                                                                                           | $2.85 \times 10^{-10}$ |
| GO:0006950 | Response to stress    | 172         | A2m, Acot2, Adrb2, Aldh3a2, Ang, Aoc3, Apcs, Apoa4, Ass1, B4galt1, Bcl3, Bdh1, Bmp6, Brca1, Btg3, C1qb, C2, C230052I12Rik, C4b, C4bp, Camk1d, Camp, Ccnd1, Ccr5, Cd14, Cd163, Cd28, Cd44, Cd9, Cdc42ep5, Cdca5, Cdkn1a, Cgrefl, Chac1, Chi3l3, Clec4n, Cpb2, Cr2, Creb3l2, Csf1r, Ctss, Cul7, Cxcl1, Cxcl13, Cxcl2, Cyba, Cycs, Dap, Ddit4, Ddt, Derl3, Dnajb9, Dnajc10, Dnajc3, Ecm1, Edem1, Egfr, Egr1, Ero1l, Eya4, Fabp5, Fads1, Fance, Fas, Fcgr3, Fgb, Fgf3, Fmod, Fn1, Fosl2, Gata6, Gck, Gja1, Gja3, Gsn, Gsta4, Gstm1, Gstm3, Hamp, Hamp2, Hbegf, Herc6, Hmgb1, Hp, Hspa1a, Hspa1b, Hspa8, Hspb1, Icam1, Id2, Idh2, Ier3, Ifi47, Ifitm2, Ifitm3, Ifna9, Igfbp2, Iigp1, Ikbke, Il18bp, Il1r1, Il1rn, Immt, Itih4, Jun, Lbp, Lcn2, Lepr, Ly75, Lyz2, Marco, Mastl, Mbl1, Mecom, Mgl1, Mtss1, Ncf1, Nfkbiz, Ngp, Nrep, Opa1, Orm1, Orm2, P2rx7, Pdia6, Pdk4, Pik3r1, Pklr, Plac8, Pld1, Plk3, Pou2f3, Ppargc1b, Ppbp, Pros1, Psmc9, Ptpn1, Rbbp8, Rbm3, Reg3b, Reg3g, S100a9, Saa1, Saa2, Saa3, Saa4, Sarm1, Scd1, Sele, Serpina3n, Serpine1, Serpinf2, Shprh, Slc29a1, Snca, Socs3, Srd5a1, Stat3, Tfr, Timp1, Tlr13, Tnfaip8l2, Tnfrsf1a, Trp53inp1, Tsc22d2, Ulk2, Usp28, Vldlr, Vsig4, Wipi1, Xbp1 | $4.19 \times 10^{-24}$ |
| GO:0006953 | Acute-phase response  | 21          | A2m, Apcs, Ass1, Cd163, Fn1, Hp, Il1rn, Itih4, Lbp, Orm1, Orm2, Reg3b, Reg3g, Saa1, Saa2, Saa3, Saa4, Serpina3n, Serpinf2, Stat3, Tfr                                                                                                                                                                                                                                                                                                                                                                                                                                                                                                                                                                                                                                                                                                                                                                                                                                                                                                                                                                                                                                                                        | $7.78 \times 10^{-20}$ |

|            |                                          |    |                                                                                                                                                                                                                                                                                                                                                                                                                                                                                                                                                                                                                                                                     |                        |
|------------|------------------------------------------|----|---------------------------------------------------------------------------------------------------------------------------------------------------------------------------------------------------------------------------------------------------------------------------------------------------------------------------------------------------------------------------------------------------------------------------------------------------------------------------------------------------------------------------------------------------------------------------------------------------------------------------------------------------------------------|------------------------|
| GO:0006629 | Lipid metabolic process                  | 90 | Abcd2, Acaa1a, Acnat2, Acot1, Acot12, Acot2, Acot4, Acs11, Afp, Agpat6, Aldh3a2, Alox5ap, Ang, Apo4, Atp5a1, Atp8b1, B3galt1, B4galt4, Bdh1, Brca1, Cacna1h, Cers6, Ces1d, Ces1f, Ces2a, Chkb, Cpt2, Cryl1, Csf1r, Cyp39a1, Cyp4v3, Cyp7a1, Cyp8b1, Eci1, Egfr, Ehhadh, Elovl2, Elovl5, Enpp2, Fabp2, Fabp4, Fabp5, Fads1, Fads2, G0s2, G6pc, Gata6, Ghr, Gpc4, Gpd2, Hadha, Hsd17b6, Hsd3b5, Il1rn, Isyna1, Ivd, Lepr, Lpgat1, Lpin2, Me1, Mgl1, Mtmr7, Nans, Ncf1, P2rx7, Pex11a, Piga, Pik3c2a, Pik3r1, Pik3r5, Plch1, Plcx2, Pld1, Pnpla2, Ppargc1b, Ptgr1, Rbp1, Retsat, Saa1, Scd1, Sdc4, Smpd3, Snca, Sqle, Srd5a1, St8sia4, Sult1e1, Timp1, Tnfrsf1a, Vldlr | $5.47 \times 10^{-19}$ |
| GO:0034097 | Response to cytokine stimulus            | 53 | 1100001G20Rik, Acs11, Ass1, Camp, Ccr5, Cd14, Cd44, Cish, Csf1r, Cxcl13, Cxcl2, Cyba, Egr1, Fas, Fgb, Fn1, Fosl2, Gapdh, Ghr, Hmgb1, Icam1, Ifi205, Ifitm2, Ifitm3, Iigp1, Il13ra1, Il18bp, Il1r1, Il1rn, Irak3, Irf2, Itih4, Jun, Lcn2, Lepr, Mcl1, Mme, Nfil3, Pid1, Ptpn1, Ptpn2, Sec61a1, Sele, Serpina3m, Serpina3n, Serpine1, Snca, Socs3, Stat3, Tgtp1, Timp1, Tnfrsf1a, Vldlr                                                                                                                                                                                                                                                                               | $3.23 \times 10^{-13}$ |
| GO:0055114 | Oxidation-reduction process              | 63 | Abcd2, Acaa1a, Aldh111, Aldh3a2, Alox5ap, Aoc3, Atp5a1, Bdh1, Cp, Cpt2, Cryl1, Cyb561, Cyba, Cysc, Cyp2c44, Cyp2c70, Cyp39a1, Cyp4a12a, Cyp4v3, Cyp7a1, Cyp8b1, Dnajc10, Eci1, Ehhadh, Ero11, Fads1, Fads2, G6pc, Gapdh, Gck, Gpd2, Gyg, Hadha, Hsd17b6, Hsd3b5, Hsd12, Idh2, Idh3b, Ivd, Lepr, Mdh1, Me1, Moxd1, Mthfd1, Ncf1, Ncf4, Ndufa5, Ogdh, Pck2, Pcyox11, Pdia4, Pdia6, Pid1, Pklr, Ptgr1, Qsox1, Retsat, Scd1, Snca, Sqle, Srd5a1, Steap4, Uba5                                                                                                                                                                                                           | $1.01 \times 10^{-08}$ |
| GO:0034976 | Response to endoplasmic reticulum stress | 14 | Ccnd1, Chac1, Creb3l2, Cul7, Derl3, Dnajb9, Dnajc10, Dnajc3, Edem1, Ero11, Pdia6, Ptpn1, Wipi1, Xbp1                                                                                                                                                                                                                                                                                                                                                                                                                                                                                                                                                                | $1.33 \times 10^{-05}$ |
| GO:0019221 | Cytokine-mediated signaling pathway      | 23 | Acs11, Ccr5, Cd44, Cish, Csf1r, Cxcl13, Egr1, Fas, Ghr, Icam1, Ifitm2, Ifitm3, Iigp1, Il13ra1, Il1r1, Irak3, Irf2, Lepr, Ptpn1, Ptpn2, Socs3, Stat3, Tnfrsf1a                                                                                                                                                                                                                                                                                                                                                                                                                                                                                                       | $2.44 \times 10^{-05}$ |
| GO:0006006 | Glucose metabolic process                | 14 | Eno1, Fabp5, G6pc, Gapdh, Gck, Got1, Gpd2, Hk2, Mdh1, Ogdh, Pck2, Pdk4, Pik3r1, Pklr                                                                                                                                                                                                                                                                                                                                                                                                                                                                                                                                                                                | $2.96 \times 10^{-04}$ |
| GO:0008219 | Cell death                               | 49 | Aco2, Ang, Bcl2l13, Bik, Brca1, C1d, Ccl6, Ccr5, Cd14, Chac1, Cul7, Cxcl2, Cysc, Dap, Dapl1, Ddit4, Dynl11, Ero11, Fas, Fgd2, Fosl2, G0s2, Gan, Gapdh, Gas1, Gata6, Gja1, Gsn, Hmgb1, Hspb1, Ier3, Irak3, Lcn2, Lyz2, Mageh1, Mcl1, Mecom, Ncf1, Opa1, P2rx7, Plk3, Psmd9, S100a9, Slc9a3r1, Tgm6, Tnfrsf1a, Trp53inp1, Zbtb16, Zc3h12a                                                                                                                                                                                                                                                                                                                             | $5.70 \times 10^{-04}$ |

|            |                                              |    |                                                                                                                                                                                                                                                                          |                        |
|------------|----------------------------------------------|----|--------------------------------------------------------------------------------------------------------------------------------------------------------------------------------------------------------------------------------------------------------------------------|------------------------|
| GO:0006805 | Xenobiotic metabolic process                 | 11 | Acs11, Cyp39a1, Cyp7a1, Cyp8b1, Gsta2, Gsta4, Gstm1, Gstm3, Papss2, Sult1e1, Ugt2b1                                                                                                                                                                                      | $8.44 \times 10^{-04}$ |
| GO:0097193 | Intrinsic apoptotic signaling pathway        | 12 | Bcl3, Brca1, Cdkn1a, Chac1, Cul3, Cyps, Ddit4, Dnajc10, Dynl11, Ero11, Ikbke, Usp28                                                                                                                                                                                      | $9.55 \times 10^{-04}$ |
| GO:0097190 | Apoptotic signaling pathway                  | 18 | Bcl3, Brca1, Cd28, Cdkn1a, Chac1, Cul3, Cyps, Dap, Ddit4, Dnajc10, Dynl11, Ero11, Fas, Fgd2, Igf1, Ikbke, Tnfrsf1a, Usp28                                                                                                                                                | 0.00123                |
| GO:0060333 | Interferon-gamma-mediated signaling pathway  | 6  | Cd44, Icam1, Irf2, Ptpn1, Ptpn2, Socs3                                                                                                                                                                                                                                   | 0.0013                 |
| GO:0007259 | JAK-STAT cascade                             | 6  | Cish, Ghr, Ptpn1, Socs2, Socs3, Stat3                                                                                                                                                                                                                                    | 0.00166                |
| GO:0006749 | Glutathione metabolic process                | 6  | Alox5ap, Gsta2, Gsta4, Gstm1, Gstm3, Gstt2                                                                                                                                                                                                                               | 0.00357                |
| GO:0012501 | Programmed cell death                        | 39 | Bcl2l13, Bik, Brca1, C1d, Ccl6, Cd14, Chac1, Cul7, Cyps, Dap, Dapl1, Ddit4, Dynl11, Ero11, Fas, Fgd2, G0s2, Gapdh, Gas1, Gata6, Gja1, Gsn, Hmgb1, Ier3, Irak3, Lcn2, Mageh1, Mcl1, Mecom, Ncf1, Opa1, Plk3, Psm9, S100a9, Slc9a3r1, Tnfrsf1a, Trp53inp1, Zbtb16, Zc3h12a | 0.004                  |
| GO:0002224 | Toll-like receptor signaling pathway         | 9  | Cd14, Ctss, Ikbke, Irak3, Jun, Lbp, Reg3g, Sarm1, Tlr13                                                                                                                                                                                                                  | 0.00864                |
| GO:0001666 | Response to hypoxia                          | 17 | Acot2, Adrb2, Ang, Ddit4, Egr1, Fas, Fosl2, Gata6, Hp, Icam1, Lepr, Pklr, Slc29a1, Socs3, Tfrc, Tnfrsf1a, Vldlr                                                                                                                                                          | 0.01062                |
| GO:0006979 | Response to oxidative stress                 | 17 | Aldh3a2, Apoa4, Btg3, Cyps, Egfr, Fn1, Gja3, Hp, Il18bp, Il1r1, Jun, Lcn2, Plk3, Ppargc1b, Serpine1, Snca, Trp53inp1                                                                                                                                                     | 0.01665                |
| GO:0002764 | Immune response-regulating signaling pathway | 15 | Cd14, Cr2, Ctss, Fcgr3, Fyb, Ikbke, Irak3, Jun, Lbp, Marco, Pik3r1, Reg3g, Sarm1, Tlr13                                                                                                                                                                                  | 0.02658                |

The functional properties of DEGs were analysed using the GeneXplain platform and the *p*-value threshold was set as  $< 0.05$ .

**Supplementary Table S7: Top bio-functions of differentially expressed genes after single diclofenac treatment**

| Category                                             | <i>p</i> -value   | Molecules                                                                                                                                                                                                                                             |
|------------------------------------------------------|-------------------|-------------------------------------------------------------------------------------------------------------------------------------------------------------------------------------------------------------------------------------------------------|
| <b>Diseases and Disorders</b>                        |                   |                                                                                                                                                                                                                                                       |
| Cancer                                               | 3.13E-08-2.92E-02 | Pvrl3, Ets2, Sfpq, Serpina3, Tnxb, Nek2, Ptpnj, Cxcl13, Apcs, T2a, Lbp, Fcgr3a, Timp3, Arid5b, Orm1/Orm2, Esp11, Il13ra1, Lcn2, Tll1, Slc7a8, Stat3, Hist1h3a (includes others), Mlph, Il18bp, Islr, Prss23, Fam198b, C18orf1, Sik1, Pml, Mt1e, Hmgb2 |
| Inflammatory Response                                | 1.79E-06-2.78E-02 | Timp3, Orm1/Orm2, Ear2 (Includes Others), Lcn2, Fpr2, Ets2, Serpina3, Stat3, Il18bp, Cxcl13, Prss23, Ptpnj, Prtn3, Apcs, Plcb1, Lbp, Pml, Fcgr3a, Mt1e                                                                                                |
| Gastrointestinal Disease                             | 1.8E-06-2.78E-02  | Pvrl3, Sfpq, Serpina3, Tnxb, Nek2, Ptpnj, Cxcl13, Apcs, Mt2a, Cdy1, Fgf23, Plcb1, Lbp, Timp3, Lcn2, Tll1, Stat3, Hist1h3a (Includes others), Mlph, Islr, Prss23, C18orf1, Tcf19, Pml, Mt1e, Hmgb2                                                     |
| Organismal Injury and Abnormalities                  | 9.65E-06-2.48E-02 | Mt2a, Lcn2, Fgf23, Stat3, Mt1e                                                                                                                                                                                                                        |
| Renal and Urological Disease                         | 9.65E-06-2.78E-02 | Timp3, Ptpnj, Apcs, Prtn3, Mt2a, Lcn2, Fgf23, Ets2, Serpina3, Pml, Fcgr3a, Mt1e                                                                                                                                                                       |
| <b>Molecular and Cellular Functions</b>              |                   |                                                                                                                                                                                                                                                       |
| Cellular Movement                                    | 1.49E-06-2.78E-02 | Timp3, Arid5b, Orm1/Orm2, Ear2 (includes others), Lcn2, Fpr2, Gfra2, Serpina3, Stat3, Il18bp, Ptpnj, Cxcl13, Prtn3, Apcs, Lbp, Fcgr3a, Hmgb2                                                                                                          |
| Molecular Transport                                  | 1.78E-06-2.55E-02 | Orm1/Orm2, Fpr2, Gfra2, Stat3, Il18bp, Gnat1, Cxcl13, Ptpnj, Mt2a, Fgf23, Sik1, Plcb1, Lbp, Pml, Fcgr3a, Mt1e                                                                                                                                         |
| Cell Death                                           | 9.65E-06-2.89E-02 | Timp3, Esp11, Lcn2, Ets2, Serpina3, Gfra2, Stat3, Nek2, Gnat1, Apcs, Prtn3, Mt2a, Lbp, Pml, Mt1e, Fcgr3a, Hmgb2                                                                                                                                       |
| Cellular Assembly and Organization                   | 9.65E-06-2.79E-02 | Timp3, Esp11, Pvrl3, Serpina3, Gfra2, Stat3, Tnxb, Mlph, Nek2, Mt2a, Apcs, Sik1, Mup1(Includes others), Lbp, Pml, Mt1e, Hmgb2                                                                                                                         |
| Cellular Compromise                                  | 9.65E-06-1.86E-02 | Nek2, Prss23, Mt2a, Apcs, Plcb1, Stat3, Pml, Mt1e, Hmgb2                                                                                                                                                                                              |
| <b>Physiological System Development and Function</b> |                   |                                                                                                                                                                                                                                                       |
| Hematological System Development and Function        | 1.49E-06-3.04E-02 | Timp3, Orm1/Orm2, Ear2 (includes others), Lcn2, Fpr2, Ets2, Serpina3, Stat3, Il18bp, Cxcl13, Ptpnj, Prtn3, Apcs, Plcb1, Lbp, Pml, Fcgr3a, Hmgb2                                                                                                       |
| Immune Cell Trafficking                              | 1.49E-06-2.78E-02 | Timp3, Orm1/Orm2, Ear2 (includes others), Lcn2, Fpr2, Ets2, Serpina3, Stat3, Il18bp, Cxcl13, Ptpnj, Apcs, Prtn3, Plcb1, Lbp, Pml, Fcgr3a                                                                                                              |
| Hepatic System Development and Function              | 9.65E-06-2.49E-02 | Mt2a, Lbp, Pml, Meg3, Mt1e                                                                                                                                                                                                                            |
| Hematopoiesis                                        | 1.44E-04-2.78E-02 | Cxcl13, Apcs, Lcn2, Ets2, Plcb1, Stat3, Pml, Hmgb2                                                                                                                                                                                                    |
| Tissue Development                                   | 2.33E-04-2.85E-02 | Pvrl3, Ets2, Tnxb, Ptpnj, Gnat1, Cxcl13, Mt2a, Apcs, Cdy1, Fgf23, Plcb1, Lbp, Arid5b, Timp3, Orm1/Orm2, Lcn2, Fpr2, Tll1, Gfra2, Stat3, Meg3, Il18bp, Prtn3, Pml, Hmgb2                                                                               |

In total, 295 genes were selected based on a cutoff of > 1.5-fold change ( $P < 0.05$ ) using the GenePlex program. Bio-functions were analyzed using the ingenuity pathway analysis program (IPA).

**Supplementary Table S8: Top bio-functions of differentially expressed genes after repeated diclofenac treatment for 3 days**

| Category                                             | <i>p</i> -value   | Molecules                                                                                                                                                                                                                                                   |
|------------------------------------------------------|-------------------|-------------------------------------------------------------------------------------------------------------------------------------------------------------------------------------------------------------------------------------------------------------|
| <b>Diseases and Disorders</b>                        |                   |                                                                                                                                                                                                                                                             |
| Inflammatory Response                                | 4.35E-11-1.15E-02 | Socs3, Sell, Sirpb1, Serpina3, Ces1, Cd55/Daf2, Psg18 (includes others), Tnfrsf12a, Ca3, Cxcl3, Wasl, Apcs, S100a8, Lbp, Egfr, Ptpre, Hdac4, Orm1/Orm2, Cd93, Lcn2, Let-7, F13a1, Bcl3, Il1r1, Stat3, Gnaz, Il33, Chi313/Chi314, S100a9, Prtn3, Ctsc, Cxcl2 |
| Infectious Disease                                   | 8.27E-07-1.1E-02  | Socs3, Tmprss2, Plk3, Lcn2, Let-7, F13a1, Saa2, Bcl3, Il1r1, Stat3, Cxcl3, Wasl, S100a9, Apcs, Snx10, S100a8, Lbp                                                                                                                                           |
| Inflammatory Disease                                 | 8.27E-07-9.8E-03  | Socs3, Sell, Slc1a4, Serpina3, Saa2, Slc39a14, Cd55/Daf2, Cxcl3, Apcs, S100a8, Lbp, Slc41a1, Hdac4, Lcn2, Let-7, F13a1, Il1r1, Stat3, Xiap, Il33, Chi313/Chi314, S100a9, Prtn3, Cxcl2, Ctsc, Wnt11, Fam214a, Steap4, Ube2i                                  |
| Respiratory Disease                                  | 8.27E-07-1.34E-02 | Il33, Chi313/Chi314, S100a9, Apcs, Lcn2, Let-7, Bcl3, Saa2, Il1r1, Lbp, Stat3, Egfr                                                                                                                                                                         |
| Hematological Disease                                | 1.5E-06-1.25E-02  | Socs3, Sell, Ptpre, Slc1a4, Hdac4, Slc22a3, Lcn2, Let-7, F13a1, Lrit2, Bcl3, Il1r1, Stat3, Xiap, Il33, Cxcl3, Tacc2, S100a9, Slc37a1, Lbp, Lpin2, Fam214a, Egfr, Ube2i                                                                                      |
| <b>Molecular and Cellular Functions</b>              |                   |                                                                                                                                                                                                                                                             |
| Cellular Movement                                    | 8.06E-09-1.26E-02 | Socs3, Sell, Serpina3, Cd55/Daf2, Tnfrsf12a, Cxcl3, Wasl, Apcs, S100a8, Lbp, Egfr, Il33, Orm1/Orm2, Cd93, Lcn2, F13a1, Stat3, Il1r1, Gnaz, Xiap, Chi313/Chi314, S100a9, Prtn3, Cxcl2, C5orf13, Wnt11, Ube2i                                                 |
| Cell-To-Cell Signaling and Interaction               | 6.67E-08-1.26E-02 | Socs3, Sell, Apoa4, Sirpb1, Cd55/Daf2, Tnfrsf12a, Cxcl3, Wasl, Apcs, S100a8, Lbp, Egfr, Ptpre, Orm1/Orm2, Hdac4, Cd93, Lcn2, F13a1, Bcl3, Il1r1, Stat3, Il33, S100a9, Prtn3, Cxcl2                                                                          |
| Antigen Presentation                                 | 1.23E-07-1.1E-02  | Socs3, Ptpre, Sell, Lcn2, Cd93, Sirpb1, Serpina3, Stat3, Ces1, Il33, Cxcl3, S100a9, Prtn3, Apcs, S100a8, Lbp, Cxcl2                                                                                                                                         |
| Lipid Metabolism                                     | 3.84E-06-1.22E-02 | Apoa4, Saa2, Il1r1, Stat3, Ces1, B3galt1, Acat1/Acat2, Lbp, Tnfrsf12a, Il33, Acot2, Gnat1, Apcs, Saa4, Cyp7a1, Acot1                                                                                                                                        |
| Molecular Transport                                  | 3.84E-06-1.13E-02 | Sell, Slc1a4, Slc22a3, Apoa4, Saa2, Slc39a14, Ces1, Tnfrsf12a, Cxcl3, Gnat1, Apcs, Saa4, Cyp7a1, S100a8, Wnk4, Lbp, Egfr, Orm1/Orm2, Lcn2, Bcl3, Stat3, Il1r1, Xiap, Il33, S100a9, Acot2, Slc3a1, Cxcl2, Ube2i                                              |
| <b>Physiological System Development and Function</b> |                   |                                                                                                                                                                                                                                                             |
| Hematological System Development and Function        | 8.06E-09-1.33E-02 | Socs3, Sell, Apoa4, Sirpb1, Serpina3, Ces1, Cd55/Daf2, Tnfrsf12a, Cxcl3, Wasl, Apcs, S100a8, Lbp, Egfr, Ptpre, Orm1/Orm2, Lcn2, Cd93, F13a1, Bcl3, Gnaz, Stat3, Il1r1, Xiap, Il33, Chi313/Chi314, S100a9, Prtn3, Cxcl2, Ube2i, Hdac4                        |
| Immune Cell Trafficking                              | 8.06E-09-1.26E-02 | Socs3, Sell, Apoa4, Serpina3, Cd55/Daf2, Cxcl3, Wasl, Apcs, S100a8, Lbp, Egfr, Ptpre, Hdac4, Orm1/Orm2, Lcn2, Cd93, F13a1, Bcl3, Gnaz, Il1r1, Stat3, Il33, Cxcl2, Chi313/Chi314, S100a9, Prtn3                                                              |
| Tissue Development                                   | 1.21E-08-1.25E-02 | Socs3, Sell, Apoa4, Hdac4, Orm1/Orm2, Lcn2, Bcl3, Il1r1, Stat3, Gnaz, Il33, Cxcl3, S100a9, Apcs, Prtn3, S100a8, Lbp, Cxcl2, Wnt11, Egfr                                                                                                                     |

|                                        |                   |                                                                                                                                                   |
|----------------------------------------|-------------------|---------------------------------------------------------------------------------------------------------------------------------------------------|
| Tissue Morphology                      | 3.69E-05-1.33E-02 | Socs3, Ptpre, Sell, Apoa4, Orm1/Orm2, Lcn2, Stat3, Il1r1, Ces1, Xiap, Tnfrsf12a, Il33, Ca3, Wasl, S100a9, Prtn3, Apcs, S100a8, Cxcl2, Rbbp4, Egfr |
| Hair and Skin Development and Function | 1.76E-04-1.1E-02  | Socs3, Sell, Stat3, Egfr                                                                                                                          |

In total, 467 genes were selected based on a cutoff of > 1.5-fold change ( $P < 0.05$ ) using the GenePlex program. Bio-functions were analyzed using the ingenuity pathway analysis program (IPA).

**Supplementary Table S9: A summary of regulated cytokines and cluster of differentiation molecules (CD) regulated by diclofenac in mice liver after single and repeated treatment**

| Genes  | Day 1<br>Fold change (average) | Day 3<br>Fold change (average) | Day 14<br>Fold change (average) |
|--------|--------------------------------|--------------------------------|---------------------------------|
| Il10   | -1.04                          | 1.06                           | -1.05                           |
| Il11   | -1.00                          | -1.02                          | -1.02                           |
| Il1b   | 1.05                           | 1.00                           | 2.60                            |
| Il15   | -1.19                          | 1.06                           | 1.07                            |
| Il17ra | 1.48                           | 1.71                           | 2.22                            |
| Il18   | -1.09                          | -1.05                          | 1.15                            |
| Il2    | -1.19                          | -1.33                          | 1.33                            |
| Il20   | -1.07                          | -1.01                          | 1.12                            |
| Il21   | 1.16                           | 1.11                           | 1.05                            |
| Il22   | -1.08                          | 1.30                           | 1.11                            |
| Il24   | 1.11                           | 1.09                           | -1.15                           |
| Il25   | -1.08                          | -1.13                          | 1.00                            |
| Il3    | -1.05                          | 1.04                           | -1.03                           |
| Il31   | 1.24                           | -1.03                          | 1.26                            |
| Il33   | 1.74                           | 1.54                           | 4.41                            |
| Il34   | 1.01                           | -1.11                          | -1.04                           |
| Il4    | 1.09                           | 1.22                           | 1.10                            |
| Il5    | 1.06                           | 1.06                           | 1.05                            |
| Il6    | 1.08                           | 1.15                           | 4.04                            |
| Il7    | 1.20                           | 1.33                           | 1.03                            |
| Il9    | -1.17                          | -1.02                          | -1.08                           |
| Irf2   | -1.07                          | -1.07                          | 1.48                            |
| Tcra   | -1.13                          | -1.08                          | -1.05                           |
| Tnf    | 1.08                           | -1.06                          | -1.14                           |
| Tgfb   | -1.23                          | 1.3                            | -1.28                           |
| Cxcl1  | 17.36                          | 19.1                           | 25.73                           |
| Cxcl2  | 2.3                            | 1.61                           | 11.74                           |
| Cxcl13 | 1.98                           | 2.02                           | 14.62                           |
| Cxcl14 | 2.93                           | 1.06                           | 4.12                            |
| Ccl6   | 2.99                           | 1.68                           | 3.66                            |
| Cd4    | -1.04                          | -1.06                          | 1.38                            |
| Cd14   | 1.78                           | 1.48                           | 34.68                           |
| Cd163  | 1.73                           | 1.35                           | 2.51                            |
| Cd177  | 1.72                           | -1.10                          | 1.71                            |
| Cd28   | 2.31                           | 1.21                           | 5.82                            |



|      |      |       |      |
|------|------|-------|------|
| Cd36 | 1.52 | 1.16  | 1.21 |
| Cd44 | 1.67 | 1.49  | 1.83 |
| Cd74 | 1.42 | 1.06  | 1.06 |
| Cd9  | 1.33 | 1.31  | 1.76 |
| Cd8  | 1.09 | -1.34 | 1.10 |

**Supplementary Table S10: Summary of transcription factor binding site search results for DEGs after single diclofenac treatment.** The TRANSFAC® 2013.2 library of positional weight matrices and ‘vertebrate\_non\_redundant\_minSUM’ profile were used to identify enriched transcription factor binding sites in the promoters of genes coding for inflammation, immune and stress response. Promoters of annotated genes were interrogated for cis-regulatory binding sites of genomic sequences with a length of -1000 to +100 bp relative to TSS. The first ATG codon was considered as tentative TSS (transcription start site). Each significant PWM ( $p < 0.05$ ) is mentioned with Yes density per 1000bp, No density per 1000bp and Yes-No ratio values.

**Supplementary Table S11: Transcription factor binding site search results for DEGs after repeated treatment of mice for 3 days**

**Supplementary Table S12: Transcription factor binding site search results for DEGs after repeated treatment of mice for 14 days**

**Supplementary Table S13: Number of transcription factor binding sites in promoters of regulated genes after single diclofenac treatment**

**Supplementary Table S14: Number of transcription factor binding sites in promoters of regulated genes after repeated diclofenac treatment for 3 days**

**Supplementary Table S15: Number of TFBS in the composite modules of inflammation, immune and stress response DEGs after repeated diclofenac treatment (day 14)**

**Supplementary Table S16: Common DEGs identified in mouse hepatocyte cultures and *in vivo* findings after single and repeated diclofenac treatment of mice**

| Genes     | Description                                                                                        | <i>In vitro</i><br>(Fold<br>change) | Day 1<br>(Fold<br>change) | Day 3<br>(Fold<br>change) | Day 14<br>(Fold<br>change) |
|-----------|----------------------------------------------------------------------------------------------------|-------------------------------------|---------------------------|---------------------------|----------------------------|
| Agxt211   | Alanine-glyoxylate aminotransferase 2-like 1                                                       | -5.66                               | -1.79                     | -2.18                     | -3.16                      |
| Cxcl1     | Chemokine (C-X-C motif) ligand 1                                                                   | -13.91                              | 17.36                     | 19.1                      | 25.73                      |
| Dnajc12   | DnaJ (Hsp40) homolog, subfamily C, member 12                                                       | -2.97                               | 3.29                      | 2.70                      | 2.09                       |
| Fndc3b    | Fibronectin type III domain containing 3B                                                          | 2.33                                | 2.99                      | 2.04                      | 2.28                       |
| Hp        | Haptoglobin                                                                                        | -3.80                               | 1.43                      | 1.57                      | 1.44                       |
| Hsd3b5    | Hydroxy-delta-5-steroid dehydrogenase, 3 beta- and steroid delta-isomerase 5                       | 2.47                                | -2.42                     | -1.63                     | -1.43                      |
| Hspa1a    | Heat shock protein 1A                                                                              | 2.47                                | 1.71                      | -1.45                     | 1.68                       |
| Icam1     | Intercellular adhesion molecule 1                                                                  | -6.63                               | 1.75                      | 1.85                      | 2.01                       |
| Il33      | Interleukin 33                                                                                     | -3.51                               | 1.74                      | 1.54                      | 4.41                       |
| Lbp       | Lipopolysaccharide binding protein                                                                 | -4.60                               | 1.88                      | 1.67                      | -1.69                      |
| Ly6e      | Lymphocyte antigen 6 complex, locus E                                                              | -8.25                               | 1.58                      | 1.69                      | 2.40                       |
| Marco     | Macrophage receptor with collagenous structure                                                     | -2.82                               | 4.00                      | 1.98                      | 7.20                       |
| Nfkbiz    | Nuclear factor of kappa light polypeptide gene enhancer in B-cells inhibitor, zeta                 | -3.28                               | 2.90                      | 1.69                      | 3.33                       |
| Saa4      | Serum amyloid A 4                                                                                  | -3.16                               | 1.78                      | 2.18                      | 2.30                       |
| Serpina10 | Serine (or cysteine) peptidase inhibitor, clade A (alpha-1 antiproteinase, antitrypsin), member 10 | -22.74                              | 1.95                      | 1.91                      | 3.05                       |
| Slc25a30  | Solute carrier family 25, member 30                                                                | -7.31                               | -1.75                     | -2.10                     | -1.64                      |
| Slco1a4   | Solute carrier organic anion transporter family, member 1a4                                        | -3.68                               | -1.50                     | -1.43                     | -1.54                      |
| Steap4    | STEAP family member 4                                                                              | -21.91                              | 3.02                      | 4.81                      | 14.58                      |
| Tmem176a  | Transmembrane protein 176A                                                                         | -10.91                              | 1.79                      | 1.52                      | 2.21                       |
| Tsc22d1   | TSC22 domain family, member 1                                                                      | -10.51                              | -1.67                     | -1.55                     | -1.43                      |
